# Supplementary material
Source: ML conference proceedings conference paper supplement (https://openaccess.thecvf.com/content/ICCV2023/html/Hajder_Fast_Globally_Optimal_ICCV_2023_paper.html)
Supplement: Supplementary file 2 [file Hajder_Fast_Globally_Optimal_ICCV_2023_supplemental.zip]

# Mathematical derivations of the optimal formulae

Formula/equation numbers refer to the ones in the article.

In this file, components of the normal vector in (1) are denoted by  $n = (n_1, n_2, n_3)$ ; the components of the 4 vectors  $w_{ij}$  for  $i = 1, 2$  and  $j = 1, 2$  are denoted by  $(w_{11}, w_{12}, w_{13}), (w_{21}, w_{22}, w_{23}), (w_{31}, w_{32}, w_{33})$  and  $(w_{41}, w_{42}, w_{43})$ ; components of the vector  $w_c$  are  $w_c = (w_{51}, w_{52}, w_{53})$ ; and entries of the matrix  $A$  are  $(a_{11}, a_{12}, a_{21}, a_{22})$ .

The following expression is  $f(n)$ , this expression is to be minimized:

Out[\*]=

$$\left( a_{11} - \frac{n_1 w_{11} + n_2 w_{12} + n_3 w_{13}}{n_1 w_{51} + n_2 w_{52} + n_3 w_{53}} \right)^2 + \left( a_{12} - \frac{n_1 w_{21} + n_2 w_{22} + n_3 w_{23}}{n_1 w_{51} + n_2 w_{52} + n_3 w_{53}} \right)^2 + \\ \left( a_{21} - \frac{n_1 w_{31} + n_2 w_{32} + n_3 w_{33}}{n_1 w_{51} + n_2 w_{52} + n_3 w_{53}} \right)^2 + \left( a_{22} - \frac{n_1 w_{41} + n_2 w_{42} + n_3 w_{43}}{n_1 w_{51} + n_2 w_{52} + n_3 w_{53}} \right)^2$$

---

## Case A, $n_3=1$

We make the substitution  $n_3 = 1$ :

$$In[*]:= \left( a_{11} - \frac{n_1 w_{11} + n_2 w_{12} + n_3 w_{13}}{n_1 w_{51} + n_2 w_{52} + n_3 w_{53}} \right)^2 + \left( a_{12} - \frac{n_1 w_{21} + n_2 w_{22} + n_3 w_{23}}{n_1 w_{51} + n_2 w_{52} + n_3 w_{53}} \right)^2 + \\ \left( a_{21} - \frac{n_1 w_{31} + n_2 w_{32} + n_3 w_{33}}{n_1 w_{51} + n_2 w_{52} + n_3 w_{53}} \right)^2 + \left( a_{22} - \frac{n_1 w_{41} + n_2 w_{42} + n_3 w_{43}}{n_1 w_{51} + n_2 w_{52} + n_3 w_{53}} \right)^2 /. n_3 \rightarrow 1$$

Out[\*]=

$$\left( a_{11} - \frac{n_1 w_{11} + n_2 w_{12} + w_{13}}{n_1 w_{51} + n_2 w_{52} + w_{53}} \right)^2 + \left( a_{12} - \frac{n_1 w_{21} + n_2 w_{22} + w_{23}}{n_1 w_{51} + n_2 w_{52} + w_{53}} \right)^2 + \\ \left( a_{21} - \frac{n_1 w_{31} + n_2 w_{32} + w_{33}}{n_1 w_{51} + n_2 w_{52} + w_{53}} \right)^2 + \left( a_{22} - \frac{n_1 w_{41} + n_2 w_{42} + w_{43}}{n_1 w_{51} + n_2 w_{52} + w_{53}} \right)^2$$

We compute its partial derivative w.r.t. the first variable (that is,  $\partial_1 g(n_x, n_y)$  in the article) and take only the numerator (it is assumed that the denominator is non-zero):

```

In[*]:= D[ (a11 - (n1 w11 + n2 w12 + w13) / (n1 w51 + n2 w52 + w53))^2 + (a12 - (n1 w21 + n2 w22 + w23) / (n1 w51 + n2 w52 + w53))^2 +
  (a21 - (n1 w31 + n2 w32 + w33) / (n1 w51 + n2 w52 + w53))^2 + (a22 - (n1 w41 + n2 w42 + w43) / (n1 w51 + n2 w52 + w53))^2,
  n1] // Together // Numerator // Simplify

Out[*]=
2 (-w13^2 w51 - w23^2 w51 - w33^2 w51 - w43^2 w51 +
  n2^2 (-w12^2 w51 - w22^2 w51 - w32^2 w51 - w42^2 w51 + w31 w32 w52 + w41 w42 w52 +
    a21 w32 w51 w52 + a22 w42 w51 w52 + w12 (w11 + a11 w51) w52 +
    w22 (w21 + a12 w51) w52 - a11 w11 w52^2 - a12 w21 w52^2 - a21 w31 w52^2 - a22 w41 w52^2) +
  w11 w13 w53 + w21 w23 w53 + w31 w33 w53 + w41 w43 w53 + a11 w13 w51 w53 +
  a12 w23 w51 w53 + a21 w33 w51 w53 + a22 w43 w51 w53 -
  a11 w11 w53^2 - a12 w21 w53^2 - a21 w31 w53^2 - a22 w41 w53^2 +
  n2 (-2 w12 w13 w51 - 2 w22 w23 w51 - 2 w32 w33 w51 - 2 w42 w43 w51 + w11 w13 w52 +
    w21 w23 w52 + w31 w33 w52 + w41 w43 w52 + a11 w13 w51 w52 + a12 w23 w51 w52 +
    a21 w33 w51 w52 + a22 w43 w51 w52 + w31 w32 w53 + w41 w42 w53 + a21 w32 w51 w53 +
    a22 w42 w51 w53 + w12 (w11 + a11 w51) w53 + w22 (w21 + a12 w51) w53 -
    2 a11 w11 w52 w53 - 2 a12 w21 w52 w53 - 2 a21 w31 w52 w53 - 2 a22 w41 w52 w53) +
  n1 (-w21 w23 w51 - w31 w33 w51 - w41 w43 w51 + a11 w13 w51^2 +
    a12 w23 w51^2 + a21 w33 w51^2 + a22 w43 w51^2 +
    n2 (-w31 w32 w51 - w41 w42 w51 + a11 w12 w51^2 + a12 w22 w51^2 + a21 w32 w51^2 +
      a22 w42 w51^2 + w11^2 w52 + w21^2 w52 + w31^2 w52 + w41^2 w52 - a21 w31 w51 w52 -
      a22 w41 w51 w52 - w11 w51 (w12 + a11 w52) - w21 w51 (w22 + a12 w52)) +
    w11^2 w53 + w21^2 w53 + w31^2 w53 + w41^2 w53 - a12 w21 w51 w53 -
    a21 w31 w51 w53 - a22 w41 w51 w53 - w11 w51 (w13 + a11 w53)))

```

Now we express the first component to obtain formula (6):

```

In[*]:= Solve[2 (-w13^2 w51 - w23^2 w51 - w33^2 w51 - w43^2 w51 +
n2^2 (-w12^2 w51 - w22^2 w51 - w32^2 w51 - w42^2 w51 + w31 w32 w52 + w41 w42 w52 +
a21 w32 w51 w52 + a22 w42 w51 w52 + w12 (w11 + a11 w51) w52 + w22 (w21 + a12 w51)
w52 - a11 w11 w52^2 - a12 w21 w52^2 - a21 w31 w52^2 - a22 w41 w52^2) +
w11 w13 w53 + w21 w23 w53 + w31 w33 w53 + w41 w43 w53 + a11 w13 w51 w53 +
a12 w23 w51 w53 + a21 w33 w51 w53 + a22 w43 w51 w53 -
a11 w11 w53^2 - a12 w21 w53^2 - a21 w31 w53^2 - a22 w41 w53^2 +
n2 (-2 w12 w13 w51 - 2 w22 w23 w51 - 2 w32 w33 w51 - 2 w42 w43 w51 + w11 w13 w52 +
w21 w23 w52 + w31 w33 w52 + w41 w43 w52 + a11 w13 w51 w52 + a12 w23 w51 w52 +
a21 w33 w51 w52 + a22 w43 w51 w52 + w31 w32 w53 + w41 w42 w53 + a21 w32 w51 w53 +
a22 w42 w51 w53 + w12 (w11 + a11 w51) w53 + w22 (w21 + a12 w51) w53 -
2 a11 w11 w52 w53 - 2 a12 w21 w52 w53 - 2 a21 w31 w52 w53 - 2 a22 w41 w52 w53) +
n1 (-w21 w23 w51 - w31 w33 w51 - w41 w43 w51 + a11 w13 w51^2 +
a12 w23 w51^2 + a21 w33 w51^2 + a22 w43 w51^2 +
n2 (-w31 w32 w51 - w41 w42 w51 + a11 w12 w51^2 + a12 w22 w51^2 + a21 w32 w51^2 +
a22 w42 w51^2 + w11^2 w52 + w21^2 w52 + w31^2 w52 + w41^2 w52 - a21 w31 w51 w52 -
a22 w41 w51 w52 - w11 w51 (w12 + a11 w52) - w21 w51 (w22 + a12 w52)) +
w11^2 w53 + w21^2 w53 + w31^2 w53 + w41^2 w53 - a12 w21 w51 w53 - a21 w31 w51 w53 -
a22 w41 w51 w53 - w11 w51 (w13 + a11 w53))] == 0, n1] // Simplify

```

Out[\*]=

```

{ {n1 →
- ( (-w13^2 w51 - w23^2 w51 - w33^2 w51 - w43^2 w51 + n2^2 (-w12^2 w51 - w22^2 w51 - w32^2 w51 -
w42^2 w51 + w31 w32 w52 + w41 w42 w52 + a21 w32 w51 w52 +
a22 w42 w51 w52 + w12 (w11 + a11 w51) w52 + w22 (w21 + a12 w51) w52 -
a11 w11 w52^2 - a12 w21 w52^2 - a21 w31 w52^2 - a22 w41 w52^2) +
w21 w23 w53 + w31 w33 w53 + w41 w43 w53 + a12 w23 w51 w53 +
a21 w33 w51 w53 + a22 w43 w51 w53 + w13 (w11 + a11 w51) w53 -
a11 w11 w53^2 - a12 w21 w53^2 - a21 w31 w53^2 - a22 w41 w53^2 +
n2 (-2 w12 w13 w51 - 2 w22 w23 w51 - 2 w32 w33 w51 - 2 w42 w43 w51 +
w11 w13 w52 + w21 w23 w52 + w31 w33 w52 + w41 w43 w52 + a11 w13 w51 w52 +
a12 w23 w51 w52 + a21 w33 w51 w52 + a22 w43 w51 w52 + w31 w32 w53 +
w41 w42 w53 + a21 w32 w51 w53 + a22 w42 w51 w53 + w12 (w11 + a11 w51) w53 +
w22 (w21 + a12 w51) w53 - 2 a11 w11 w52 w53 - 2 a12 w21 w52 w53 -
2 a21 w31 w52 w53 - 2 a22 w41 w52 w53) ) /
(-w21 w23 w51 - w31 w33 w51 - w41 w43 w51 + a11 w13 w51^2 +
a12 w23 w51^2 + a21 w33 w51^2 + a22 w43 w51^2 +
n2 (-w31 w32 w51 - w41 w42 w51 + a11 w12 w51^2 + a12 w22 w51^2 + a21 w32 w51^2 +
a22 w42 w51^2 + w11^2 w52 + w21^2 w52 + w31^2 w52 + w41^2 w52 - a21 w31 w51 w52 -
a22 w41 w51 w52 - w11 w51 (w12 + a11 w52) - w21 w51 (w22 + a12 w52) ) +
w11^2 w53 + w21^2 w53 + w31^2 w53 + w41^2 w53 - a12 w21 w51 w53 -
a21 w31 w51 w53 - a22 w41 w51 w53 - w11 w51 (w13 + a11 w53) ) ) } }

```

We compute the partial derivative w.r.t. the second variable (that is,  $\partial_2 g(n_x, n_y)$ ):

$$In[ ] := D \left[ \left( a_{11} - \frac{n_1 w_{11} + n_2 w_{12} + w_{13}}{n_1 w_{51} + n_2 w_{52} + w_{53}} \right)^2 + \left( a_{12} - \frac{n_1 w_{21} + n_2 w_{22} + w_{23}}{n_1 w_{51} + n_2 w_{52} + w_{53}} \right)^2 + \left( a_{21} - \frac{n_1 w_{31} + n_2 w_{32} + w_{33}}{n_1 w_{51} + n_2 w_{52} + w_{53}} \right)^2 + \left( a_{22} - \frac{n_1 w_{41} + n_2 w_{42} + w_{43}}{n_1 w_{51} + n_2 w_{52} + w_{53}} \right)^2, n_2 \right] // \text{Together} // \text{Simplify}$$

Out[ ] =

$$\frac{1}{(n_1 w_{51} + n_2 w_{52} + w_{53})^3} \left( \begin{aligned} & 2 \left( -w_{13}^2 w_{52} - w_{23}^2 w_{52} - w_{33}^2 w_{52} - w_{43}^2 w_{52} + \right. \\ & n_1^2 \left( w_{31} w_{32} w_{51} + w_{41} w_{42} w_{51} - a_{11} w_{12} w_{51}^2 - a_{12} w_{22} w_{51}^2 - a_{21} w_{32} w_{51}^2 - \right. \\ & a_{22} w_{42} w_{51}^2 - w_{11}^2 w_{52} - w_{21}^2 w_{52} - w_{31}^2 w_{52} - w_{41}^2 w_{52} + a_{21} w_{31} w_{51} w_{52} + \\ & a_{22} w_{41} w_{51} w_{52} + w_{11} w_{51} (w_{12} + a_{11} w_{52}) + w_{21} w_{51} (w_{22} + a_{12} w_{52}) \Big) + \\ & w_{12} w_{13} w_{53} + w_{22} w_{23} w_{53} + w_{32} w_{33} w_{53} + w_{42} w_{43} w_{53} + a_{11} w_{13} w_{52} w_{53} + \\ & a_{12} w_{23} w_{52} w_{53} + a_{21} w_{33} w_{52} w_{53} + a_{22} w_{43} w_{52} w_{53} - \\ & a_{11} w_{12} w_{53}^2 - a_{12} w_{22} w_{53}^2 - a_{21} w_{32} w_{53}^2 - a_{22} w_{42} w_{53}^2 + \\ & n_1 \left( w_{12} w_{13} w_{51} + w_{22} w_{23} w_{51} + w_{32} w_{33} w_{51} + w_{42} w_{43} w_{51} - \right. \\ & 2 w_{11} w_{13} w_{52} - 2 w_{21} w_{23} w_{52} - 2 w_{31} w_{33} w_{52} - 2 w_{41} w_{43} w_{52} + \\ & a_{11} w_{13} w_{51} w_{52} + a_{12} w_{23} w_{51} w_{52} + a_{21} w_{33} w_{51} w_{52} + a_{22} w_{43} w_{51} w_{52} + \\ & n_2 \left( w_{12}^2 w_{51} + w_{22}^2 w_{51} + w_{32}^2 w_{51} + w_{42}^2 w_{51} - w_{31} w_{32} w_{52} - w_{41} w_{42} w_{52} - a_{21} w_{32} \right. \\ & w_{51} w_{52} - a_{22} w_{42} w_{51} w_{52} - w_{12} (w_{11} + a_{11} w_{51}) w_{52} - w_{22} (w_{21} + a_{12} w_{51}) \\ & w_{52} + a_{11} w_{11} w_{52}^2 + a_{12} w_{21} w_{52}^2 + a_{21} w_{31} w_{52}^2 + a_{22} w_{41} w_{52}^2 \Big) + \\ & w_{11} w_{12} w_{53} + w_{21} w_{22} w_{53} + w_{31} w_{32} w_{53} + w_{41} w_{42} w_{53} - 2 a_{11} w_{12} w_{51} w_{53} - \\ & 2 a_{12} w_{22} w_{51} w_{53} - 2 a_{21} w_{32} w_{51} w_{53} - 2 a_{22} w_{42} w_{51} w_{53} + \\ & a_{11} w_{11} w_{52} w_{53} + a_{12} w_{21} w_{52} w_{53} + a_{21} w_{31} w_{52} w_{53} + a_{22} w_{41} w_{52} w_{53} \Big) + \\ & n_2 \left( -w_{32} w_{33} w_{52} - w_{42} w_{43} w_{52} + a_{11} w_{13} w_{52}^2 + a_{12} w_{23} w_{52}^2 + a_{21} w_{33} w_{52}^2 + \right. \\ & a_{22} w_{43} w_{52}^2 + w_{12}^2 w_{53} + w_{22}^2 w_{53} + w_{32}^2 w_{53} + w_{42}^2 w_{53} - a_{21} w_{32} w_{52} w_{53} - \\ & a_{22} w_{42} w_{52} w_{53} - w_{12} w_{52} (w_{13} + a_{11} w_{53}) - w_{22} w_{52} (w_{23} + a_{12} w_{53}) \Big) \Big) \end{aligned} \right)$$

We then substitute the “red” expression (that is,  $n_1$  expressed with  $n_2$ ) into the “blue” one (that is, into  $\partial_2 g(n_x, n_y)$ ) to define the expression “factorize”

$$\begin{aligned}
\text{factorize} = & \frac{1}{(n1 w51 + n2 w52 + w53)^3} \left( \begin{aligned}
& 2 \left( -w13^2 w52 - w23^2 w52 - w33^2 w52 - w43^2 w52 + \right. \\
& n1^2 \left( w31 w32 w51 + w41 w42 w51 - a11 w12 w51^2 - a12 w22 w51^2 - a21 w32 w51^2 - \right. \\
& \quad a22 w42 w51^2 - w11^2 w52 - w21^2 w52 - w31^2 w52 - w41^2 w52 + a21 w31 w51 w52 + \\
& \quad a22 w41 w51 w52 + w11 w51 (w12 + a11 w52) + w21 w51 (w22 + a12 w52) \left. \right) + \\
& w12 w13 w53 + w22 w23 w53 + w32 w33 w53 + w42 w43 w53 + a11 w13 w52 w53 + \\
& a12 w23 w52 w53 + a21 w33 w52 w53 + a22 w43 w52 w53 - \\
& a11 w12 w53^2 - a12 w22 w53^2 - a21 w32 w53^2 - a22 w42 w53^2 + \\
& n1 \left( w12 w13 w51 + w22 w23 w51 + w32 w33 w51 + w42 w43 w51 - \right. \\
& \quad 2 w11 w13 w52 - 2 w21 w23 w52 - 2 w31 w33 w52 - 2 w41 w43 w52 + \\
& \quad a11 w13 w51 w52 + a12 w23 w51 w52 + a21 w33 w51 w52 + a22 w43 w51 w52 + \\
& \quad n2 \left( w12^2 w51 + w22^2 w51 + w32^2 w51 + w42^2 w51 - w31 w32 w52 - w41 w42 w52 - a21 w32 \right. \\
& \quad \quad w51 w52 - a22 w42 w51 w52 - w12 (w11 + a11 w51) w52 - w22 (w21 + a12 w51) \\
& \quad \quad w52 + a11 w11 w52^2 + a12 w21 w52^2 + a21 w31 w52^2 + a22 w41 w52^2 \left. \right) + \\
& \quad w11 w12 w53 + w21 w22 w53 + w31 w32 w53 + w41 w42 w53 - 2 a11 w12 w51 w53 - \\
& \quad 2 a12 w22 w51 w53 - 2 a21 w32 w51 w53 - 2 a22 w42 w51 w53 + \\
& \quad a11 w11 w52 w53 + a12 w21 w52 w53 + a21 w31 w52 w53 + a22 w41 w52 w53 \left. \right) + \\
& n2 \left( -w32 w33 w52 - w42 w43 w52 + a11 w13 w52^2 + a12 w23 w52^2 + a21 w33 w52^2 + \right. \\
& \quad a22 w43 w52^2 + w12^2 w53 + w22^2 w53 + w32^2 w53 + w42^2 w53 - a21 w32 w52 w53 - \\
& \quad a22 w42 w52 w53 - w12 w52 (w13 + a11 w53) - w22 w52 (w23 + a12 w53) \left. \right) \left. \right) / . \\
& n1 \rightarrow - \left( \begin{aligned}
& (-w13^2 w51 - w23^2 w51 - w33^2 w51 - w43^2 w51 + n2^2 (-w12^2 w51 - w22^2 w51 - \\
& \quad w32^2 w51 - w42^2 w51 + w31 w32 w52 + w41 w42 w52 + a21 w32 w51 w52 + \\
& \quad a22 w42 w51 w52 + w12 (w11 + a11 w51) w52 + w22 (w21 + a12 w51) w52 - \\
& \quad a11 w11 w52^2 - a12 w21 w52^2 - a21 w31 w52^2 - a22 w41 w52^2) + \\
& w21 w23 w53 + w31 w33 w53 + w41 w43 w53 + a12 w23 w51 w53 + \\
& a21 w33 w51 w53 + a22 w43 w51 w53 + w13 (w11 + a11 w51) w53 - \\
& a11 w11 w53^2 - a12 w21 w53^2 - a21 w31 w53^2 - a22 w41 w53^2 + \\
& n2 (-2 w12 w13 w51 - 2 w22 w23 w51 - 2 w32 w33 w51 - 2 w42 w43 w51 + w11 w13 w52 + \\
& \quad w21 w23 w52 + w31 w33 w52 + w41 w43 w52 + a11 w13 w51 w52 + a12 w23 w51 w52 + \\
& \quad a21 w33 w51 w52 + a22 w43 w51 w52 + w31 w32 w53 + w41 w42 w53 + a21 w32 w51 \\
& \quad w53 + a22 w42 w51 w53 + w12 (w11 + a11 w51) w53 + w22 (w21 + a12 w51) w53 - 2 \\
& \quad a11 w11 w52 w53 - 2 a12 w21 w52 w53 - 2 a21 w31 w52 w53 - 2 a22 w41 w52 w53) \left. \right) / \\
& (-w21 w23 w51 - w31 w33 w51 - w41 w43 w51 + a11 w13 w51^2 + a12 w23 w51^2 + \\
& \quad a21 w33 w51^2 + a22 w43 w51^2 + \\
& n2 (-w31 w32 w51 - w41 w42 w51 + a11 w12 w51^2 + a12 w22 w51^2 + a21 w32 w51^2 + \\
& \quad a22 w42 w51^2 + w11^2 w52 + w21^2 w52 + w31^2 w52 + w41^2 w52 - a21 w31 w51 w52 - \\
& \quad a22 w41 w51 w52 - w11 w51 (w12 + a11 w52) - w21 w51 (w22 + a12 w52) \left. \right) + \\
& w11^2 w53 + w21^2 w53 + w31^2 w53 + w41^2 w53 - a12 w21 w51 w53 - \\
& a21 w31 w51 w53 - a22 w41 w51 w53 - w11 w51 (w13 + a11 w53) \left. \right) \left. \right)
\end{aligned}
\right)
\end{aligned}$$

The expression “factorize” to be factorized appears below, depending only on n2:

Out[\*]=

$$\begin{aligned}
& \left( 2 \left( -w13^2 w52 - w23^2 w52 - w33^2 w52 - w43^2 w52 + w12 w13 w53 + w22 w23 w53 + \right. \right. \\
& \quad w32 w33 w53 + w42 w43 w53 + a11 w13 w52 w53 + a12 w23 w52 w53 + a21 w33 w52 w53 + \\
& \quad a22 w43 w52 w53 - a11 w12 w53^2 - a12 w22 w53^2 - a21 w32 w53^2 - a22 w42 w53^2 +
\end{aligned}$$

$$\begin{aligned}
& n2 \left( -w32 w33 w52 - w42 w43 w52 + a11 w13 w52^2 + a12 w23 w52^2 + a21 w33 w52^2 + \right. \\
& \quad a22 w43 w52^2 + w12^2 w53 + w22^2 w53 + w32^2 w53 + w42^2 w53 - a21 w32 w52 w53 - \\
& \quad \left. a22 w42 w52 w53 - w12 w52 (w13 + a11 w53) - w22 w52 (w23 + a12 w53) \right) - \\
& \left( (w12 w13 w51 + w22 w23 w51 + w32 w33 w51 + w42 w43 w51 - 2 w11 w13 w52 - \right. \\
& \quad 2 w21 w23 w52 - 2 w31 w33 w52 - 2 w41 w43 w52 + a11 w13 w51 w52 + \\
& \quad a12 w23 w51 w52 + a21 w33 w51 w52 + a22 w43 w51 w52 + \\
& \quad n2 (w12^2 w51 + w22^2 w51 + w32^2 w51 + w42^2 w51 - w31 w32 w52 - w41 w42 w52 - \\
& \quad a21 w32 w51 w52 - a22 w42 w51 w52 - w12 (w11 + a11 w51) w52 - w22 (w21 + a12 \\
& \quad w51) w52 + a11 w11 w52^2 + a12 w21 w52^2 + a21 w31 w52^2 + a22 w41 w52^2) + \\
& \quad w11 w12 w53 + w21 w22 w53 + w31 w32 w53 + w41 w42 w53 - 2 a11 w12 w51 w53 - \\
& \quad 2 a12 w22 w51 w53 - 2 a21 w32 w51 w53 - 2 a22 w42 w51 w53 + \\
& \quad a11 w11 w52 w53 + a12 w21 w52 w53 + a21 w31 w52 w53 + a22 w41 w52 w53) \\
& \quad \left. (-w13^2 w51 - w23^2 w51 - w33^2 w51 - w43^2 w51 + n2^2 (-w12^2 w51 - w22^2 w51 - \right. \\
& \quad w32^2 w51 - w42^2 w51 + w31 w32 w52 + w41 w42 w52 + a21 w32 w51 w52 + \\
& \quad a22 w42 w51 w52 + w12 (w11 + a11 w51) w52 + w22 (w21 + a12 w51) w52 - \\
& \quad a11 w11 w52^2 - a12 w21 w52^2 - a21 w31 w52^2 - a22 w41 w52^2) + w21 w23 w53 + \\
& \quad w31 w33 w53 + w41 w43 w53 + a12 w23 w51 w53 + a21 w33 w51 w53 + \\
& \quad a22 w43 w51 w53 + w13 (w11 + a11 w51) w53 - a11 w11 w53^2 - a12 w21 w53^2 - \\
& \quad a21 w31 w53^2 - a22 w41 w53^2 + n2 (-2 w12 w13 w51 - 2 w22 w23 w51 - 2 w32 w33 w51 - \\
& \quad 2 w42 w43 w51 + w11 w13 w52 + w21 w23 w52 + w31 w33 w52 + w41 w43 w52 + \\
& \quad a11 w13 w51 w52 + a12 w23 w51 w52 + a21 w33 w51 w52 + a22 w43 w51 w52 + \\
& \quad w31 w32 w53 + w41 w42 w53 + a21 w32 w51 w53 + a22 w42 w51 w53 + \\
& \quad w12 (w11 + a11 w51) w53 + w22 (w21 + a12 w51) w53 - 2 a11 w11 w52 w53 - \\
& \quad \left. 2 a12 w21 w52 w53 - 2 a21 w31 w52 w53 - 2 a22 w41 w52 w53) \right) \Big) / \\
& \left( -w21 w23 w51 - w31 w33 w51 - w41 w43 w51 + a11 w13 w51^2 + a12 w23 w51^2 + \right. \\
& \quad a21 w33 w51^2 + a22 w43 w51^2 + \\
& \quad n2 (-w31 w32 w51 - w41 w42 w51 + a11 w12 w51^2 + a12 w22 w51^2 + a21 w32 w51^2 + \\
& \quad a22 w42 w51^2 + w11^2 w52 + w21^2 w52 + w31^2 w52 + w41^2 w52 - a21 w31 w51 w52 - \\
& \quad a22 w41 w51 w52 - w11 w51 (w12 + a11 w52) - w21 w51 (w22 + a12 w52) \Big) + \\
& \quad w11^2 w53 + w21^2 w53 + w31^2 w53 + w41^2 w53 - a12 w21 w51 w53 - \\
& \quad a21 w31 w51 w53 - a22 w41 w51 w53 - w11 w51 (w13 + a11 w53) \Big) + \\
& \left( (w31 w32 w51 + w41 w42 w51 - a11 w12 w51^2 - a12 w22 w51^2 - a21 w32 w51^2 - \right. \\
& \quad a22 w42 w51^2 - w11^2 w52 - w21^2 w52 - w31^2 w52 - w41^2 w52 + a21 w31 w51 w52 + \\
& \quad a22 w41 w51 w52 + w11 w51 (w12 + a11 w52) + w21 w51 (w22 + a12 w52) \Big) \\
& \quad \left. (-w13^2 w51 - w23^2 w51 - w33^2 w51 - w43^2 w51 + n2^2 (-w12^2 w51 - w22^2 w51 - w32^2 \right. \\
& \quad w51 - w42^2 w51 + w31 w32 w52 + w41 w42 w52 + a21 w32 w51 w52 + a22 \\
& \quad w42 w51 w52 + w12 (w11 + a11 w51) w52 + w22 (w21 + a12 w51) w52 - a11 \\
& \quad w11 w52^2 - a12 w21 w52^2 - a21 w31 w52^2 - a22 w41 w52^2) + w21 w23 w53 + \\
& \quad w31 w33 w53 + w41 w43 w53 + a12 w23 w51 w53 + a21 w33 w51 w53 + \\
& \quad a22 w43 w51 w53 + w13 (w11 + a11 w51) w53 - a11 w11 w53^2 - a12 w21 w53^2 - \\
& \quad a21 w31 w53^2 - a22 w41 w53^2 + n2 (-2 w12 w13 w51 - 2 w22 w23 w51 - 2 w32 w33 \\
& \quad w51 - 2 w42 w43 w51 + w11 w13 w52 + w21 w23 w52 + w31 w33 w52 + w41 w43 \\
& \quad w52 + a11 w13 w51 w52 + a12 w23 w51 w52 + a21 w33 w51 w52 + a22 w43 \\
& \quad w51 w52 + w31 w32 w53 + w41 w42 w53 + a21 w32 w51 w53 + a22 w42 w51 \\
& \quad w53 + w12 (w11 + a11 w51) w53 + w22 (w21 + a12 w51) w53 - 2 a11 w11 w52 \\
& \quad \left. w52 - 2 a12 w21 w52 w53 - 2 a21 w31 w52 w53 - 2 a22 w41 w52 w53) \right) \Big)
\end{aligned}$$

$$\begin{aligned}
& \left( w53 - 2 a12 w21 w52 w53 - 2 a21 w31 w52 w53 - 2 a22 w41 w52 w53 \right)^2 \Big/ \\
& \left( -w21 w23 w51 - w31 w33 w51 - w41 w43 w51 + a11 w13 w51^2 + a12 w23 w51^2 + \right. \\
& \quad a21 w33 w51^2 + a22 w43 w51^2 + \\
& \quad n2 \left( -w31 w32 w51 - w41 w42 w51 + a11 w12 w51^2 + a12 w22 w51^2 + a21 w32 w51^2 + \right. \\
& \quad \quad a22 w42 w51^2 + w11^2 w52 + w21^2 w52 + w31^2 w52 + w41^2 w52 - a21 w31 w51 w52 - \\
& \quad \quad a22 w41 w51 w52 - w11 w51 (w12 + a11 w52) - w21 w51 (w22 + a12 w52) \Big) + \\
& \quad w11^2 w53 + w21^2 w53 + w31^2 w53 + w41^2 w53 - a12 w21 w51 w53 - \\
& \quad \left. a21 w31 w51 w53 - a22 w41 w51 w53 - w11 w51 (w13 + a11 w53) \right)^2 \Big) \Big/ \\
& \left( n2 w52 + w53 - \left( w51 \left( -w13^2 w51 - w23^2 w51 - w33^2 w51 - w43^2 w51 + n2^2 \left( -w12^2 w51 - \right. \right. \right. \right. \\
& \quad w22^2 w51 - w32^2 w51 - w42^2 w51 + w31 w32 w52 + w41 w42 w52 + a21 w32 w51 w52 + \\
& \quad a22 w42 w51 w52 + w12 (w11 + a11 w51) w52 + w22 (w21 + a12 w51) w52 - \\
& \quad a11 w11 w52^2 - a12 w21 w52^2 - a21 w31 w52^2 - a22 w41 w52^2 \Big) + w21 w23 w53 + \\
& \quad w31 w33 w53 + w41 w43 w53 + a12 w23 w51 w53 + a21 w33 w51 w53 + \\
& \quad a22 w43 w51 w53 + w13 (w11 + a11 w51) w53 - a11 w11 w53^2 - a12 w21 w53^2 - \\
& \quad a21 w31 w53^2 - a22 w41 w53^2 + n2 \left( -2 w12 w13 w51 - 2 w22 w23 w51 - 2 w32 w33 w51 - \right. \\
& \quad \quad 2 w42 w43 w51 + w11 w13 w52 + w21 w23 w52 + w31 w33 w52 + w41 w43 w52 + \\
& \quad \quad a11 w13 w51 w52 + a12 w23 w51 w52 + a21 w33 w51 w52 + a22 w43 w51 w52 + \\
& \quad \quad w31 w32 w53 + w41 w42 w53 + a21 w32 w51 w53 + a22 w42 w51 w53 + \\
& \quad \quad w12 (w11 + a11 w51) w53 + w22 (w21 + a12 w51) w53 - 2 a11 w11 w52 w53 - \\
& \quad \quad \left. \left. \left. \left. 2 a12 w21 w52 w53 - 2 a21 w31 w52 w53 - 2 a22 w41 w52 w53 \right) \right) \right) \Big/ \\
& \left( -w21 w23 w51 - w31 w33 w51 - w41 w43 w51 + a11 w13 w51^2 + a12 w23 w51^2 + \right. \\
& \quad a21 w33 w51^2 + a22 w43 w51^2 + \\
& \quad n2 \left( -w31 w32 w51 - w41 w42 w51 + a11 w12 w51^2 + a12 w22 w51^2 + a21 w32 w51^2 + \right. \\
& \quad \quad a22 w42 w51^2 + w11^2 w52 + w21^2 w52 + w31^2 w52 + w41^2 w52 - a21 w31 w51 w52 - \\
& \quad \quad a22 w41 w51 w52 - w11 w51 (w12 + a11 w52) - w21 w51 (w22 + a12 w52) \Big) + \\
& \quad w11^2 w53 + w21^2 w53 + w31^2 w53 + w41^2 w53 - a12 w21 w51 w53 - \\
& \quad \left. a21 w31 w51 w53 - a22 w41 w51 w53 - w11 w51 (w13 + a11 w53) \right)^3
\end{aligned}$$

The actual factorization takes place below, and we obtain formula (7):

**Factor[factorize]**

Out[\*] =

$$\begin{aligned}
& - \left( \left( 2 \left( n2 w11 w12 w51 + w11 w13 w51 + n2 w21 w22 w51 + w21 w23 w51 + n2 w31 w32 w51 + \right. \right. \right. \\
& \quad w31 w33 w51 + n2 w41 w42 w51 + w41 w43 w51 - a11 n2 w12 w51^2 - a11 w13 w51^2 - \\
& \quad a12 n2 w22 w51^2 - a12 w23 w51^2 - a21 n2 w32 w51^2 - a21 w33 w51^2 - \\
& \quad a22 n2 w42 w51^2 - a22 w43 w51^2 - n2 w11^2 w52 - n2 w21^2 w52 - n2 w31^2 w52 - \\
& \quad n2 w41^2 w52 + a11 n2 w11 w51 w52 + a12 n2 w21 w51 w52 + a21 n2 w31 w51 w52 + \\
& \quad a22 n2 w41 w51 w52 - w11^2 w53 - w21^2 w53 - w31^2 w53 - w41^2 w53 + \\
& \quad a11 w11 w51 w53 + a12 w21 w51 w53 + a21 w31 w51 w53 + a22 w41 w51 w53 \Big) \\
& \left( n2 w12 w13 w21 w22 w51 + w13^2 w21 w22 w51 - n2 w11 w13 w22^2 w51 - \right. \\
& \quad n2 w12^2 w21 w23 w51 - w12 w13 w21 w23 w51 + n2 w11 w12 w22 w23 w51 - \\
& \quad w11 w13 w22 w23 w51 + w11 w12 w23^2 w51 + n2 w12 w13 w31 w32 w51 + \\
& \quad w13^2 w31 w32 w51 + n2 w22 w23 w31 w32 w51 + w23^2 w31 w32 w51 - n2 w11 w13 w32^2 w51 - \\
& \quad n2 w21 w23 w32^2 w51 - n2 w12^2 w31 w33 w51 - w12 w13 w31 w33 w51 - \\
& \quad n2 w22^2 w31 w33 w51 - w22 w23 w31 w33 w51 + n2 w11 w12 w32 w33 w51 - \\
& \quad \left. \left. \left. \left. w11 w13 w32 w33 w51 + n2 w21 w22 w32 w33 w51 - w21 w23 w32 w33 w51 + \right. \right. \right.
\end{aligned}$$

$$\begin{aligned}
& w_{11} w_{12} w_{33}^2 w_{51} + w_{21} w_{22} w_{33}^2 w_{51} + n_2 w_{12} w_{13} w_{41} w_{42} w_{51} + w_{13}^2 w_{41} w_{42} w_{51} + \\
& n_2 w_{22} w_{23} w_{41} w_{42} w_{51} + w_{23}^2 w_{41} w_{42} w_{51} + n_2 w_{32} w_{33} w_{41} w_{42} w_{51} + \\
& w_{33}^2 w_{41} w_{42} w_{51} - n_2 w_{11} w_{13} w_{42}^2 w_{51} - n_2 w_{21} w_{23} w_{42}^2 w_{51} - n_2 w_{31} w_{33} w_{42}^2 w_{51} - \\
& n_2 w_{12}^2 w_{41} w_{43} w_{51} - w_{12} w_{13} w_{41} w_{43} w_{51} - n_2 w_{22}^2 w_{41} w_{43} w_{51} - \\
& w_{22} w_{23} w_{41} w_{43} w_{51} - n_2 w_{32}^2 w_{41} w_{43} w_{51} - w_{32} w_{33} w_{41} w_{43} w_{51} + \\
& n_2 w_{11} w_{12} w_{42} w_{43} w_{51} - w_{11} w_{13} w_{42} w_{43} w_{51} + n_2 w_{21} w_{22} w_{42} w_{43} w_{51} - \\
& w_{21} w_{23} w_{42} w_{43} w_{51} + n_2 w_{31} w_{32} w_{42} w_{43} w_{51} - w_{31} w_{33} w_{42} w_{43} w_{51} + \\
& w_{11} w_{12} w_{43}^2 w_{51} + w_{21} w_{22} w_{43}^2 w_{51} + w_{31} w_{32} w_{43}^2 w_{51} - a_{12} n_2 w_{12} w_{13} w_{22} w_{51}^2 - \\
& a_{12} w_{13}^2 w_{22} w_{51}^2 + a_{11} n_2 w_{13} w_{22}^2 w_{51}^2 + a_{12} n_2 w_{12}^2 w_{23} w_{51}^2 + \\
& a_{12} w_{12} w_{13} w_{23} w_{51}^2 - a_{11} n_2 w_{12} w_{22} w_{23} w_{51}^2 + a_{11} w_{13} w_{22} w_{23} w_{51}^2 - \\
& a_{11} w_{12} w_{23}^2 w_{51}^2 - a_{21} n_2 w_{12} w_{13} w_{32} w_{51}^2 - a_{21} w_{13}^2 w_{32} w_{51}^2 - \\
& a_{21} n_2 w_{22} w_{23} w_{32} w_{51}^2 - a_{21} w_{23}^2 w_{32} w_{51}^2 + a_{11} n_2 w_{13} w_{32}^2 w_{51}^2 + \\
& a_{12} n_2 w_{23} w_{32}^2 w_{51}^2 + a_{21} n_2 w_{12}^2 w_{33} w_{51}^2 + a_{21} w_{12} w_{13} w_{33} w_{51}^2 + \\
& a_{21} n_2 w_{22}^2 w_{33} w_{51}^2 + a_{21} w_{22} w_{23} w_{33} w_{51}^2 - a_{11} n_2 w_{12} w_{32} w_{33} w_{51}^2 + \\
& a_{11} w_{13} w_{32} w_{33} w_{51}^2 - a_{12} n_2 w_{22} w_{32} w_{33} w_{51}^2 + a_{12} w_{23} w_{32} w_{33} w_{51}^2 - \\
& a_{11} w_{12} w_{33}^2 w_{51}^2 - a_{12} w_{22} w_{33}^2 w_{51}^2 - a_{22} n_2 w_{12} w_{13} w_{42} w_{51}^2 - a_{22} w_{13}^2 w_{42} w_{51}^2 - \\
& a_{22} n_2 w_{22} w_{23} w_{42} w_{51}^2 - a_{22} w_{23}^2 w_{42} w_{51}^2 - a_{22} n_2 w_{32} w_{33} w_{42} w_{51}^2 - \\
& a_{22} w_{33}^2 w_{42} w_{51}^2 + a_{11} n_2 w_{13} w_{42}^2 w_{51}^2 + a_{12} n_2 w_{23} w_{42}^2 w_{51}^2 + \\
& a_{21} n_2 w_{33} w_{42}^2 w_{51}^2 + a_{22} n_2 w_{12}^2 w_{43} w_{51}^2 + a_{22} w_{12} w_{13} w_{43} w_{51}^2 + \\
& a_{22} n_2 w_{22}^2 w_{43} w_{51}^2 + a_{22} w_{22} w_{23} w_{43} w_{51}^2 + a_{22} n_2 w_{32}^2 w_{43} w_{51}^2 + \\
& a_{22} w_{32} w_{33} w_{43} w_{51}^2 - a_{11} n_2 w_{12} w_{42} w_{43} w_{51}^2 + a_{11} w_{13} w_{42} w_{43} w_{51}^2 - \\
& a_{12} n_2 w_{22} w_{42} w_{43} w_{51}^2 + a_{12} w_{23} w_{42} w_{43} w_{51}^2 - a_{21} n_2 w_{32} w_{42} w_{43} w_{51}^2 + \\
& a_{21} w_{33} w_{42} w_{43} w_{51}^2 - a_{11} w_{12} w_{43}^2 w_{51}^2 - a_{12} w_{22} w_{43}^2 w_{51}^2 - \\
& a_{21} w_{32} w_{43}^2 w_{51}^2 - n_2 w_{12} w_{13} w_{21}^2 w_{52} - w_{13}^2 w_{21}^2 w_{52} + n_2 w_{11} w_{13} w_{21} w_{22} w_{52} + \\
& n_2 w_{11} w_{12} w_{21} w_{23} w_{52} + 2 w_{11} w_{13} w_{21} w_{23} w_{52} - n_2 w_{11}^2 w_{22} w_{23} w_{52} - \\
& w_{11}^2 w_{23}^2 w_{52} - n_2 w_{12} w_{13} w_{31}^2 w_{52} - w_{13}^2 w_{31}^2 w_{52} - n_2 w_{22} w_{23} w_{31}^2 w_{52} - \\
& w_{23}^2 w_{31}^2 w_{52} + n_2 w_{11} w_{13} w_{31} w_{32} w_{52} + n_2 w_{21} w_{23} w_{31} w_{32} w_{52} + \\
& n_2 w_{11} w_{12} w_{31} w_{33} w_{52} + 2 w_{11} w_{13} w_{31} w_{33} w_{52} + n_2 w_{21} w_{22} w_{31} w_{33} w_{52} + \\
& 2 w_{21} w_{23} w_{31} w_{33} w_{52} - n_2 w_{11}^2 w_{32} w_{33} w_{52} - n_2 w_{21}^2 w_{32} w_{33} w_{52} - \\
& w_{11}^2 w_{33}^2 w_{52} - w_{21}^2 w_{33}^2 w_{52} - n_2 w_{12} w_{13} w_{41}^2 w_{52} - w_{13}^2 w_{41}^2 w_{52} - \\
& n_2 w_{22} w_{23} w_{41}^2 w_{52} - w_{23}^2 w_{41}^2 w_{52} - n_2 w_{32} w_{33} w_{41}^2 w_{52} - w_{33}^2 w_{41}^2 w_{52} + \\
& n_2 w_{11} w_{13} w_{41} w_{42} w_{52} + n_2 w_{21} w_{23} w_{41} w_{42} w_{52} + n_2 w_{31} w_{33} w_{41} w_{42} w_{52} + \\
& n_2 w_{11} w_{12} w_{41} w_{43} w_{52} + 2 w_{11} w_{13} w_{41} w_{43} w_{52} + n_2 w_{21} w_{22} w_{41} w_{43} w_{52} + \\
& 2 w_{21} w_{23} w_{41} w_{43} w_{52} + n_2 w_{31} w_{32} w_{41} w_{43} w_{52} + 2 w_{31} w_{33} w_{41} w_{43} w_{52} - \\
& n_2 w_{11}^2 w_{42} w_{43} w_{52} - n_2 w_{21}^2 w_{42} w_{43} w_{52} - n_2 w_{31}^2 w_{42} w_{43} w_{52} - \\
& w_{11}^2 w_{43}^2 w_{52} - w_{21}^2 w_{43}^2 w_{52} - w_{31}^2 w_{43}^2 w_{52} + a_{12} n_2 w_{12} w_{13} w_{21} w_{51} w_{52} + \\
& a_{12} w_{13}^2 w_{21} w_{51} w_{52} + a_{12} n_2 w_{11} w_{13} w_{22} w_{51} w_{52} - 2 a_{11} n_2 w_{13} w_{21} w_{22} w_{51} w_{52} - \\
& 2 a_{12} n_2 w_{11} w_{12} w_{23} w_{51} w_{52} - a_{12} w_{11} w_{13} w_{23} w_{51} w_{52} + \\
& a_{11} n_2 w_{12} w_{21} w_{23} w_{51} w_{52} - a_{11} w_{13} w_{21} w_{23} w_{51} w_{52} + a_{11} n_2 w_{11} w_{22} w_{23} w_{51} w_{52} + \\
& a_{11} w_{11} w_{23}^2 w_{51} w_{52} + a_{21} n_2 w_{12} w_{13} w_{31} w_{51} w_{52} + a_{21} w_{13}^2 w_{31} w_{51} w_{52} + \\
& a_{21} n_2 w_{22} w_{23} w_{31} w_{51} w_{52} + a_{21} w_{23}^2 w_{31} w_{51} w_{52} + a_{21} n_2 w_{11} w_{13} w_{32} w_{51} w_{52} + \\
& a_{21} n_2 w_{21} w_{23} w_{32} w_{51} w_{52} - 2 a_{11} n_2 w_{13} w_{31} w_{32} w_{51} w_{52} - \\
& 2 a_{12} n_2 w_{23} w_{31} w_{32} w_{51} w_{52} - 2 a_{21} n_2 w_{11} w_{12} w_{33} w_{51} w_{52} - \\
& a_{21} w_{11} w_{13} w_{33} w_{51} w_{52} - 2 a_{21} n_2 w_{21} w_{22} w_{33} w_{51} w_{52} - a_{21} w_{21} w_{23} w_{33} w_{51} w_{52} + \\
& a_{11} n_2 w_{12} w_{31} w_{33} w_{51} w_{52} - a_{11} w_{13} w_{31} w_{33} w_{51} w_{52} + a_{12} n_2 w_{22} w_{31} w_{33} w_{51} w_{52} - \\
& a_{12} w_{23} w_{31} w_{33} w_{51} w_{52} + a_{11} n_2 w_{11} w_{32} w_{33} w_{51} w_{52} + a_{12} n_2 w_{21} w_{32} w_{33} w_{51} w_{52} + \\
& a_{11} w_{11} w_{33}^2 w_{51} w_{52} + a_{12} w_{21} w_{33}^2 w_{51} w_{52} + a_{22} n_2 w_{12} w_{13} w_{41} w_{51} w_{52} +
\end{aligned}$$



$$\begin{aligned}
& a_{22} w_{13}^2 w_{41} w_{51} w_{52} + a_{22} n_2 w_{22} w_{23} w_{41} w_{51} w_{52} + a_{22} w_{23}^2 w_{41} w_{51} w_{52} + \\
& a_{22} n_2 w_{32} w_{33} w_{41} w_{51} w_{52} + a_{22} w_{33}^2 w_{41} w_{51} w_{52} + a_{22} n_2 w_{11} w_{13} w_{42} w_{51} w_{52} + \\
& a_{22} n_2 w_{21} w_{23} w_{42} w_{51} w_{52} + a_{22} n_2 w_{31} w_{33} w_{42} w_{51} w_{52} - \\
& 2 a_{11} n_2 w_{13} w_{41} w_{42} w_{51} w_{52} - 2 a_{12} n_2 w_{23} w_{41} w_{42} w_{51} w_{52} - \\
& 2 a_{21} n_2 w_{33} w_{41} w_{42} w_{51} w_{52} - 2 a_{22} n_2 w_{11} w_{12} w_{43} w_{51} w_{52} - \\
& a_{22} w_{11} w_{13} w_{43} w_{51} w_{52} - 2 a_{22} n_2 w_{21} w_{22} w_{43} w_{51} w_{52} - a_{22} w_{21} w_{23} w_{43} w_{51} w_{52} - \\
& 2 a_{22} n_2 w_{31} w_{32} w_{43} w_{51} w_{52} - a_{22} w_{31} w_{33} w_{43} w_{51} w_{52} + a_{11} n_2 w_{12} w_{41} w_{43} w_{51} w_{52} - \\
& a_{11} w_{13} w_{41} w_{43} w_{51} w_{52} + a_{12} n_2 w_{22} w_{41} w_{43} w_{51} w_{52} - a_{12} w_{23} w_{41} w_{43} w_{51} w_{52} + \\
& a_{21} n_2 w_{32} w_{41} w_{43} w_{51} w_{52} - a_{21} w_{33} w_{41} w_{43} w_{51} w_{52} + a_{11} n_2 w_{11} w_{42} w_{43} w_{51} w_{52} + \\
& a_{12} n_2 w_{21} w_{42} w_{43} w_{51} w_{52} + a_{21} n_2 w_{31} w_{42} w_{43} w_{51} w_{52} + a_{11} w_{11} w_{43}^2 w_{51} w_{52} + \\
& a_{12} w_{21} w_{43}^2 w_{51} w_{52} + a_{21} w_{31} w_{43}^2 w_{51} w_{52} - a_{12} n_2 w_{11} w_{13} w_{21} w_{52}^2 + \\
& a_{11} n_2 w_{13} w_{21}^2 w_{52}^2 + a_{12} n_2 w_{11}^2 w_{23} w_{52}^2 - a_{11} n_2 w_{11} w_{21} w_{23} w_{52}^2 - \\
& a_{21} n_2 w_{11} w_{13} w_{31} w_{52}^2 - a_{21} n_2 w_{21} w_{23} w_{31} w_{52}^2 + a_{11} n_2 w_{13} w_{31}^2 w_{52}^2 + \\
& a_{12} n_2 w_{23} w_{31}^2 w_{52}^2 + a_{21} n_2 w_{11}^2 w_{33} w_{52}^2 + a_{21} n_2 w_{21}^2 w_{33} w_{52}^2 - \\
& a_{11} n_2 w_{11} w_{31} w_{33} w_{52}^2 - a_{12} n_2 w_{21} w_{31} w_{33} w_{52}^2 - a_{22} n_2 w_{11} w_{13} w_{41} w_{52}^2 - \\
& a_{22} n_2 w_{21} w_{23} w_{41} w_{52}^2 - a_{22} n_2 w_{31} w_{33} w_{41} w_{52}^2 + a_{11} n_2 w_{13} w_{41}^2 w_{52}^2 + \\
& a_{12} n_2 w_{23} w_{41}^2 w_{52}^2 + a_{21} n_2 w_{33} w_{41}^2 w_{52}^2 + a_{22} n_2 w_{11}^2 w_{43} w_{52}^2 + \\
& a_{22} n_2 w_{21}^2 w_{43} w_{52}^2 + a_{22} n_2 w_{31}^2 w_{43} w_{52}^2 - a_{11} n_2 w_{11} w_{41} w_{43} w_{52}^2 - \\
& a_{12} n_2 w_{21} w_{41} w_{43} w_{52}^2 - a_{21} n_2 w_{31} w_{41} w_{43} w_{52}^2 + n_2 w_{12}^2 w_{21}^2 w_{53} + \\
& w_{12} w_{13} w_{21}^2 w_{53} - 2 n_2 w_{11} w_{12} w_{21} w_{22} w_{53} - w_{11} w_{13} w_{21} w_{22} w_{53} + \\
& n_2 w_{11}^2 w_{22}^2 w_{53} - w_{11} w_{12} w_{21} w_{23} w_{53} + w_{11}^2 w_{22} w_{23} w_{53} + n_2 w_{12}^2 w_{31}^2 w_{53} + \\
& w_{12} w_{13} w_{31}^2 w_{53} + n_2 w_{22}^2 w_{31}^2 w_{53} + w_{22} w_{23} w_{31}^2 w_{53} - 2 n_2 w_{11} w_{12} w_{31} w_{32} w_{53} - \\
& w_{11} w_{13} w_{31} w_{32} w_{53} - 2 n_2 w_{21} w_{22} w_{31} w_{32} w_{53} - w_{21} w_{23} w_{31} w_{32} w_{53} + \\
& n_2 w_{11}^2 w_{32}^2 w_{53} + n_2 w_{21}^2 w_{32}^2 w_{53} - w_{11} w_{12} w_{31} w_{33} w_{53} - w_{21} w_{22} w_{31} w_{33} w_{53} + \\
& w_{11}^2 w_{32} w_{33} w_{53} + w_{21}^2 w_{32} w_{33} w_{53} + n_2 w_{12}^2 w_{41}^2 w_{53} + w_{12} w_{13} w_{41}^2 w_{53} + \\
& n_2 w_{22}^2 w_{41}^2 w_{53} + w_{22} w_{23} w_{41}^2 w_{53} + n_2 w_{32}^2 w_{41}^2 w_{53} + w_{32} w_{33} w_{41}^2 w_{53} - \\
& 2 n_2 w_{11} w_{12} w_{41} w_{42} w_{53} - w_{11} w_{13} w_{41} w_{42} w_{53} - 2 n_2 w_{21} w_{22} w_{41} w_{42} w_{53} - \\
& w_{21} w_{23} w_{41} w_{42} w_{53} - 2 n_2 w_{31} w_{32} w_{41} w_{42} w_{53} - w_{31} w_{33} w_{41} w_{42} w_{53} + \\
& n_2 w_{11}^2 w_{42}^2 w_{53} + n_2 w_{21}^2 w_{42}^2 w_{53} + n_2 w_{31}^2 w_{42}^2 w_{53} - w_{11} w_{12} w_{41} w_{43} w_{53} - \\
& w_{21} w_{22} w_{41} w_{43} w_{53} - w_{31} w_{32} w_{41} w_{43} w_{53} + w_{11}^2 w_{42} w_{43} w_{53} + \\
& w_{21}^2 w_{42} w_{43} w_{53} + w_{31}^2 w_{42} w_{43} w_{53} - a_{12} n_2 w_{12}^2 w_{21} w_{51} w_{53} - \\
& a_{12} w_{12} w_{13} w_{21} w_{51} w_{53} + a_{12} n_2 w_{11} w_{12} w_{22} w_{51} w_{53} + 2 a_{12} w_{11} w_{13} w_{22} w_{51} w_{53} + \\
& a_{11} n_2 w_{12} w_{21} w_{22} w_{51} w_{53} - a_{11} w_{13} w_{21} w_{22} w_{51} w_{53} - a_{11} n_2 w_{11} w_{22}^2 w_{51} w_{53} - \\
& a_{12} w_{11} w_{12} w_{23} w_{51} w_{53} + 2 a_{11} w_{12} w_{21} w_{23} w_{51} w_{53} - a_{11} w_{11} w_{22} w_{23} w_{51} w_{53} - \\
& a_{21} n_2 w_{12}^2 w_{31} w_{51} w_{53} - a_{21} w_{12} w_{13} w_{31} w_{51} w_{53} - a_{21} n_2 w_{22}^2 w_{31} w_{51} w_{53} - \\
& a_{21} w_{22} w_{23} w_{31} w_{51} w_{53} + a_{21} n_2 w_{11} w_{12} w_{32} w_{51} w_{53} + 2 a_{21} w_{11} w_{13} w_{32} w_{51} w_{53} + \\
& a_{21} n_2 w_{21} w_{22} w_{32} w_{51} w_{53} + 2 a_{21} w_{21} w_{23} w_{32} w_{51} w_{53} + a_{11} n_2 w_{12} w_{31} w_{32} w_{51} w_{53} - \\
& a_{11} w_{13} w_{31} w_{32} w_{51} w_{53} + a_{12} n_2 w_{22} w_{31} w_{32} w_{51} w_{53} - a_{12} w_{23} w_{31} w_{32} w_{51} w_{53} - \\
& a_{11} n_2 w_{11} w_{32}^2 w_{51} w_{53} - a_{12} n_2 w_{21} w_{32}^2 w_{51} w_{53} - a_{21} w_{11} w_{12} w_{33} w_{51} w_{53} - \\
& a_{21} w_{21} w_{22} w_{33} w_{51} w_{53} + 2 a_{11} w_{12} w_{31} w_{33} w_{51} w_{53} + 2 a_{12} w_{22} w_{31} w_{33} w_{51} w_{53} - \\
& a_{11} w_{11} w_{32} w_{33} w_{51} w_{53} - a_{12} w_{21} w_{32} w_{33} w_{51} w_{53} - a_{22} n_2 w_{12}^2 w_{41} w_{51} w_{53} - \\
& a_{22} w_{12} w_{13} w_{41} w_{51} w_{53} - a_{22} n_2 w_{22}^2 w_{41} w_{51} w_{53} - a_{22} w_{22} w_{23} w_{41} w_{51} w_{53} - \\
& a_{22} n_2 w_{32}^2 w_{41} w_{51} w_{53} - a_{22} w_{32} w_{33} w_{41} w_{51} w_{53} + a_{22} n_2 w_{11} w_{12} w_{42} w_{51} w_{53} + \\
& 2 a_{22} w_{11} w_{13} w_{42} w_{51} w_{53} + a_{22} n_2 w_{21} w_{22} w_{42} w_{51} w_{53} + 2 a_{22} w_{21} w_{23} w_{42} w_{51} w_{53} + \\
& a_{22} n_2 w_{31} w_{32} w_{42} w_{51} w_{53} + 2 a_{22} w_{31} w_{33} w_{42} w_{51} w_{53} + a_{11} n_2 w_{12} w_{41} w_{42} w_{51} w_{53} - \\
& a_{11} w_{13} w_{41} w_{42} w_{51} w_{53} + a_{12} n_2 w_{22} w_{41} w_{42} w_{51} w_{53} - a_{12} w_{23} w_{41} w_{42} w_{51} w_{53} + \\
& a_{21} n_2 w_{32} w_{41} w_{42} w_{51} w_{53} - a_{21} w_{33} w_{41} w_{42} w_{51} w_{53} - a_{11} n_2 w_{11} w_{42}^2 w_{51} w_{53} -
\end{aligned}$$

$$\begin{aligned}
& a_{12} n_2 w_{21} w_{42}^2 w_{51} w_{53} - a_{21} n_2 w_{31} w_{42}^2 w_{51} w_{53} - a_{22} w_{11} w_{12} w_{43} w_{51} w_{53} - \\
& a_{22} w_{21} w_{22} w_{43} w_{51} w_{53} - a_{22} w_{31} w_{32} w_{43} w_{51} w_{53} + 2 a_{11} w_{12} w_{41} w_{43} w_{51} w_{53} + \\
& 2 a_{12} w_{22} w_{41} w_{43} w_{51} w_{53} + 2 a_{21} w_{32} w_{41} w_{43} w_{51} w_{53} - a_{11} w_{11} w_{42} w_{43} w_{51} w_{53} - \\
& a_{12} w_{21} w_{42} w_{43} w_{51} w_{53} - a_{21} w_{31} w_{42} w_{43} w_{51} w_{53} + a_{12} n_2 w_{11} w_{12} w_{21} w_{52} w_{53} - \\
& a_{12} w_{11} w_{13} w_{21} w_{52} w_{53} - a_{11} n_2 w_{12} w_{21}^2 w_{52} w_{53} + a_{11} w_{13} w_{21}^2 w_{52} w_{53} - \\
& a_{12} n_2 w_{11}^2 w_{22} w_{52} w_{53} + a_{11} n_2 w_{11} w_{21} w_{22} w_{52} w_{53} + a_{12} w_{11}^2 w_{23} w_{52} w_{53} - \\
& a_{11} w_{11} w_{21} w_{23} w_{52} w_{53} + a_{21} n_2 w_{11} w_{12} w_{31} w_{52} w_{53} - a_{21} w_{11} w_{13} w_{31} w_{52} w_{53} + \\
& a_{21} n_2 w_{21} w_{22} w_{31} w_{52} w_{53} - a_{21} w_{21} w_{23} w_{31} w_{52} w_{53} - a_{11} n_2 w_{12} w_{31}^2 w_{52} w_{53} + \\
& a_{11} w_{13} w_{31}^2 w_{52} w_{53} - a_{12} n_2 w_{22} w_{31}^2 w_{52} w_{53} + a_{12} w_{23} w_{31}^2 w_{52} w_{53} - \\
& a_{21} n_2 w_{11}^2 w_{32} w_{52} w_{53} - a_{21} n_2 w_{21}^2 w_{32} w_{52} w_{53} + a_{11} n_2 w_{11} w_{31} w_{32} w_{52} w_{53} + \\
& a_{12} n_2 w_{21} w_{31} w_{32} w_{52} w_{53} + a_{21} w_{11}^2 w_{33} w_{52} w_{53} + a_{21} w_{21}^2 w_{33} w_{52} w_{53} - \\
& a_{11} w_{11} w_{31} w_{33} w_{52} w_{53} - a_{12} w_{21} w_{31} w_{33} w_{52} w_{53} + a_{22} n_2 w_{11} w_{12} w_{41} w_{52} w_{53} - \\
& a_{22} w_{11} w_{13} w_{41} w_{52} w_{53} + a_{22} n_2 w_{21} w_{22} w_{41} w_{52} w_{53} - a_{22} w_{21} w_{23} w_{41} w_{52} w_{53} + \\
& a_{22} n_2 w_{31} w_{32} w_{41} w_{52} w_{53} - a_{22} w_{31} w_{33} w_{41} w_{52} w_{53} - a_{11} n_2 w_{12} w_{41}^2 w_{52} w_{53} + \\
& a_{11} w_{13} w_{41}^2 w_{52} w_{53} - a_{12} n_2 w_{22} w_{41}^2 w_{52} w_{53} + a_{12} w_{23} w_{41}^2 w_{52} w_{53} - \\
& a_{21} n_2 w_{32} w_{41}^2 w_{52} w_{53} + a_{21} w_{33} w_{41}^2 w_{52} w_{53} - a_{22} n_2 w_{11}^2 w_{42} w_{52} w_{53} - \\
& a_{22} n_2 w_{21}^2 w_{42} w_{52} w_{53} - a_{22} n_2 w_{31}^2 w_{42} w_{52} w_{53} + a_{11} n_2 w_{11} w_{41} w_{42} w_{52} w_{53} + \\
& a_{12} n_2 w_{21} w_{41} w_{42} w_{52} w_{53} + a_{21} n_2 w_{31} w_{41} w_{42} w_{52} w_{53} + a_{22} w_{11}^2 w_{43} w_{52} w_{53} + \\
& a_{22} w_{21}^2 w_{43} w_{52} w_{53} + a_{22} w_{31}^2 w_{43} w_{52} w_{53} - a_{11} w_{11} w_{41} w_{43} w_{52} w_{53} - \\
& a_{12} w_{21} w_{41} w_{43} w_{52} w_{53} - a_{21} w_{31} w_{41} w_{43} w_{52} w_{53} + a_{12} w_{11} w_{12} w_{21} w_{53}^2 - \\
& a_{11} w_{12} w_{21}^2 w_{53}^2 - a_{12} w_{11}^2 w_{22} w_{53}^2 + a_{11} w_{11} w_{21} w_{22} w_{53}^2 + \\
& a_{21} w_{11} w_{12} w_{31} w_{53}^2 + a_{21} w_{21} w_{22} w_{31} w_{53}^2 - a_{11} w_{12} w_{31}^2 w_{53}^2 - \\
& a_{12} w_{22} w_{31}^2 w_{53}^2 - a_{21} w_{11}^2 w_{32} w_{53}^2 - a_{21} w_{21}^2 w_{32} w_{53}^2 + a_{11} w_{11} w_{31} w_{32} w_{53}^2 + \\
& a_{12} w_{21} w_{31} w_{32} w_{53}^2 + a_{22} w_{11} w_{12} w_{41} w_{53}^2 + a_{22} w_{21} w_{22} w_{41} w_{53}^2 + \\
& a_{22} w_{31} w_{32} w_{41} w_{53}^2 - a_{11} w_{12} w_{41}^2 w_{53}^2 - a_{12} w_{22} w_{41}^2 w_{53}^2 - \\
& a_{21} w_{32} w_{41}^2 w_{53}^2 - a_{22} w_{11}^2 w_{42} w_{53}^2 - a_{22} w_{21}^2 w_{42} w_{53}^2 - a_{22} w_{31}^2 w_{42} w_{53}^2 + \\
& a_{11} w_{11} w_{41} w_{42} w_{53}^2 + a_{12} w_{21} w_{41} w_{42} w_{53}^2 + a_{21} w_{31} w_{41} w_{42} w_{53}^2) \Big) / \\
& (n_2^2 w_{12}^2 w_{51}^2 + 2 n_2 w_{12} w_{13} w_{51}^2 + w_{13}^2 w_{51}^2 + n_2^2 w_{22}^2 w_{51}^2 + 2 n_2 w_{22} w_{23} w_{51}^2 + \\
& w_{23}^2 w_{51}^2 + n_2^2 w_{32}^2 w_{51}^2 + 2 n_2 w_{32} w_{33} w_{51}^2 + w_{33}^2 w_{51}^2 + n_2^2 w_{42}^2 w_{51}^2 + \\
& 2 n_2 w_{42} w_{43} w_{51}^2 + w_{43}^2 w_{51}^2 - 2 n_2^2 w_{11} w_{12} w_{51} w_{52} - 2 n_2 w_{11} w_{13} w_{51} w_{52} - \\
& 2 n_2^2 w_{21} w_{22} w_{51} w_{52} - 2 n_2 w_{21} w_{23} w_{51} w_{52} - 2 n_2^2 w_{31} w_{32} w_{51} w_{52} - \\
& 2 n_2 w_{31} w_{33} w_{51} w_{52} - 2 n_2^2 w_{41} w_{42} w_{51} w_{52} - 2 n_2 w_{41} w_{43} w_{51} w_{52} + n_2^2 w_{11}^2 w_{52}^2 + \\
& n_2^2 w_{21}^2 w_{52}^2 + n_2^2 w_{31}^2 w_{52}^2 + n_2^2 w_{41}^2 w_{52}^2 - 2 n_2 w_{11} w_{12} w_{51} w_{53} - \\
& 2 w_{11} w_{13} w_{51} w_{53} - 2 n_2 w_{21} w_{22} w_{51} w_{53} - 2 w_{21} w_{23} w_{51} w_{53} - \\
& 2 n_2 w_{31} w_{32} w_{51} w_{53} - 2 w_{31} w_{33} w_{51} w_{53} - 2 n_2 w_{41} w_{42} w_{51} w_{53} - \\
& 2 w_{41} w_{43} w_{51} w_{53} + 2 n_2 w_{11}^2 w_{52} w_{53} + 2 n_2 w_{21}^2 w_{52} w_{53} + 2 n_2 w_{31}^2 w_{52} w_{53} + \\
& 2 n_2 w_{41}^2 w_{52} w_{53} + w_{11}^2 w_{53}^2 + w_{21}^2 w_{53}^2 + w_{31}^2 w_{53}^2 + w_{41}^2 w_{53}^2)^2)
\end{aligned}$$

It is seen that its structure is  $\frac{\text{linear}_1 \text{linear}_2}{\text{quadratic}^2}$ .

We need to solve  $\frac{\text{linear}_1 \text{linear}_2}{\text{quadratic}^2} = 0$  for  $n_2$ . Clearly, we can ignore the denominator, so we consider only the two factors in the numerator as two separate equations.

$$\begin{aligned} \text{linear1} = & n2 w11 w12 w51 + w11 w13 w51 + n2 w21 w22 w51 + w21 w23 w51 + n2 w31 w32 w51 + \\ & w31 w33 w51 + n2 w41 w42 w51 + w41 w43 w51 - a11 n2 w12 w51^2 - a11 w13 w51^2 - \\ & a12 n2 w22 w51^2 - a12 w23 w51^2 - a21 n2 w32 w51^2 - a21 w33 w51^2 - a22 n2 w42 w51^2 - \\ & a22 w43 w51^2 - n2 w11^2 w52 - n2 w21^2 w52 - n2 w31^2 w52 - n2 w41^2 w52 + a11 n2 w11 w51 w52 + \\ & a12 n2 w21 w51 w52 + a21 n2 w31 w51 w52 + a22 n2 w41 w51 w52 - w11^2 w53 - w21^2 w53 - \\ & w31^2 w53 - w41^2 w53 + a11 w11 w51 w53 + a12 w21 w51 w53 + a21 w31 w51 w53 + a22 w41 w51 w53 \end{aligned}$$

$$\begin{aligned} \text{linear2} = & n2 w12 w13 w21 w22 w51 + w13^2 w21 w22 w51 - n2 w11 w13 w22^2 w51 - \\ & n2 w12^2 w21 w23 w51 - w12 w13 w21 w23 w51 + n2 w11 w12 w22 w23 w51 - \\ & w11 w13 w22 w23 w51 + w11 w12 w23^2 w51 + n2 w12 w13 w31 w32 w51 + w13^2 w31 w32 w51 + \\ & n2 w22 w23 w31 w32 w51 + w23^2 w31 w32 w51 - n2 w11 w13 w32^2 w51 - n2 w21 w23 w32^2 w51 - \\ & n2 w12^2 w31 w33 w51 - w12 w13 w31 w33 w51 - n2 w22^2 w31 w33 w51 - w22 w23 w31 w33 w51 + \\ & n2 w11 w12 w32 w33 w51 - w11 w13 w32 w33 w51 + n2 w21 w22 w32 w33 w51 - \\ & w21 w23 w32 w33 w51 + w11 w12 w33^2 w51 + w21 w22 w33^2 w51 + n2 w12 w13 w41 w42 w51 + \\ & w13^2 w41 w42 w51 + n2 w22 w23 w41 w42 w51 + w23^2 w41 w42 w51 + n2 w32 w33 w41 w42 w51 + \\ & w33^2 w41 w42 w51 - n2 w11 w13 w42^2 w51 - n2 w21 w23 w42^2 w51 - n2 w31 w33 w42^2 w51 - \\ & n2 w12^2 w41 w43 w51 - w12 w13 w41 w43 w51 - n2 w22^2 w41 w43 w51 - w22 w23 w41 w43 w51 - \\ & n2 w32^2 w41 w43 w51 - w32 w33 w41 w43 w51 + n2 w11 w12 w42 w43 w51 - w11 w13 w42 w43 w51 + \\ & n2 w21 w22 w42 w43 w51 - w21 w23 w42 w43 w51 + n2 w31 w32 w42 w43 w51 - \\ & w31 w33 w42 w43 w51 + w11 w12 w43^2 w51 + w21 w22 w43^2 w51 + w31 w32 w43^2 w51 - \\ & a12 n2 w12 w13 w22 w51^2 - a12 w13^2 w22 w51^2 + a11 n2 w13 w22^2 w51^2 + a12 n2 w12^2 w23 w51^2 + \\ & a12 w12 w13 w23 w51^2 - a11 n2 w12 w22 w23 w51^2 + a11 w13 w22 w23 w51^2 - a11 w12 w23^2 w51^2 - \\ & a21 n2 w12 w13 w32 w51^2 - a21 w13^2 w32 w51^2 - a21 n2 w22 w23 w32 w51^2 - a21 w23^2 w32 w51^2 + \\ & a11 n2 w13 w32^2 w51^2 + a12 n2 w23 w32^2 w51^2 + a21 n2 w12^2 w33 w51^2 + a21 w12 w13 w33 w51^2 + \\ & a21 n2 w22^2 w33 w51^2 + a21 w22 w23 w33 w51^2 - a11 n2 w12 w32 w33 w51^2 + \\ & a11 w13 w32 w33 w51^2 - a12 n2 w22 w32 w33 w51^2 + a12 w23 w32 w33 w51^2 - \\ & a11 w12 w33^2 w51^2 - a12 w22 w33^2 w51^2 - a22 n2 w12 w13 w42 w51^2 - a22 w13^2 w42 w51^2 - \\ & a22 n2 w22 w23 w42 w51^2 - a22 w23^2 w42 w51^2 - a22 n2 w32 w33 w42 w51^2 - a22 w33^2 w42 w51^2 + \\ & a11 n2 w13 w42^2 w51^2 + a12 n2 w23 w42^2 w51^2 + a21 n2 w33 w42^2 w51^2 + a22 n2 w12^2 w43 w51^2 + \\ & a22 w12 w13 w43 w51^2 + a22 n2 w22^2 w43 w51^2 + a22 w22 w23 w43 w51^2 + a22 n2 w32^2 w43 w51^2 + \\ & a22 w32 w33 w43 w51^2 - a11 n2 w12 w42 w43 w51^2 + a11 w13 w42 w43 w51^2 - \\ & a12 n2 w22 w42 w43 w51^2 + a12 w23 w42 w43 w51^2 - a21 n2 w32 w42 w43 w51^2 + \\ & a21 w33 w42 w43 w51^2 - a11 w12 w43^2 w51^2 - a12 w22 w43^2 w51^2 - a21 w32 w43^2 w51^2 - \\ & n2 w12 w13 w21^2 w52 - w13^2 w21^2 w52 + n2 w11 w13 w21 w22 w52 + n2 w11 w12 w21 w23 w52 + \\ & 2 w11 w13 w21 w23 w52 - n2 w11^2 w22 w23 w52 - w11^2 w23^2 w52 - n2 w12 w13 w31^2 w52 - \\ & w13^2 w31^2 w52 - n2 w22 w23 w31^2 w52 - w23^2 w31^2 w52 + n2 w11 w13 w31 w32 w52 + \\ & n2 w21 w23 w31 w32 w52 + n2 w11 w12 w31 w33 w52 + 2 w11 w13 w31 w33 w52 + \\ & n2 w21 w22 w31 w33 w52 + 2 w21 w23 w31 w33 w52 - n2 w11^2 w32 w33 w52 - \\ & n2 w21^2 w32 w33 w52 - w11^2 w33^2 w52 - w21^2 w33^2 w52 - n2 w12 w13 w41^2 w52 - \\ & w13^2 w41^2 w52 - n2 w22 w23 w41^2 w52 - w23^2 w41^2 w52 - n2 w32 w33 w41^2 w52 - \\ & w33^2 w41^2 w52 + n2 w11 w13 w41 w42 w52 + n2 w21 w23 w41 w42 w52 + n2 w31 w33 w41 w42 w52 + \\ & n2 w11 w12 w41 w43 w52 + 2 w11 w13 w41 w43 w52 + n2 w21 w22 w41 w43 w52 + \\ & 2 w21 w23 w41 w43 w52 + n2 w31 w32 w41 w43 w52 + 2 w31 w33 w41 w43 w52 - \\ & n2 w11^2 w42 w43 w52 - n2 w21^2 w42 w43 w52 - n2 w31^2 w42 w43 w52 - w11^2 w43^2 w52 - \\ & w21^2 w43^2 w52 - w31^2 w43^2 w52 + a12 n2 w12 w13 w21 w51 w52 + a12 w13^2 w21 w51 w52 + \\ & a12 n2 w11 w13 w22 w51 w52 - 2 a11 n2 w13 w21 w22 w51 w52 - 2 a12 n2 w11 w12 w23 w51 w52 - \\ & a12 w11 w13 w23 w51 w52 + a11 n2 w12 w21 w23 w51 w52 - a11 w13 w21 w23 w51 w52 + \end{aligned}$$

$$\begin{aligned}
& a_{11} n_2 w_{11} w_{22} w_{23} w_{51} w_{52} + a_{11} w_{11} w_{23}^2 w_{51} w_{52} + a_{21} n_2 w_{12} w_{13} w_{31} w_{51} w_{52} + \\
& a_{21} w_{13}^2 w_{31} w_{51} w_{52} + a_{21} n_2 w_{22} w_{23} w_{31} w_{51} w_{52} + a_{21} w_{23}^2 w_{31} w_{51} w_{52} + \\
& a_{21} n_2 w_{11} w_{13} w_{32} w_{51} w_{52} + a_{21} n_2 w_{21} w_{23} w_{32} w_{51} w_{52} - 2 a_{11} n_2 w_{13} w_{31} w_{32} w_{51} w_{52} - \\
& 2 a_{12} n_2 w_{23} w_{31} w_{32} w_{51} w_{52} - 2 a_{21} n_2 w_{11} w_{12} w_{33} w_{51} w_{52} - a_{21} w_{11} w_{13} w_{33} w_{51} w_{52} - \\
& 2 a_{21} n_2 w_{21} w_{22} w_{33} w_{51} w_{52} - a_{21} w_{21} w_{23} w_{33} w_{51} w_{52} + a_{11} n_2 w_{12} w_{31} w_{33} w_{51} w_{52} - \\
& a_{11} w_{13} w_{31} w_{33} w_{51} w_{52} + a_{12} n_2 w_{22} w_{31} w_{33} w_{51} w_{52} - a_{12} w_{23} w_{31} w_{33} w_{51} w_{52} + \\
& a_{11} n_2 w_{11} w_{32} w_{33} w_{51} w_{52} + a_{12} n_2 w_{21} w_{32} w_{33} w_{51} w_{52} + a_{11} w_{11} w_{33}^2 w_{51} w_{52} + \\
& a_{12} w_{21} w_{33}^2 w_{51} w_{52} + a_{22} n_2 w_{12} w_{13} w_{41} w_{51} w_{52} + a_{22} w_{13}^2 w_{41} w_{51} w_{52} + \\
& a_{22} n_2 w_{22} w_{23} w_{41} w_{51} w_{52} + a_{22} w_{23}^2 w_{41} w_{51} w_{52} + a_{22} n_2 w_{32} w_{33} w_{41} w_{51} w_{52} + \\
& a_{22} w_{33}^2 w_{41} w_{51} w_{52} + a_{22} n_2 w_{11} w_{13} w_{42} w_{51} w_{52} + a_{22} n_2 w_{21} w_{23} w_{42} w_{51} w_{52} + \\
& a_{22} n_2 w_{31} w_{33} w_{42} w_{51} w_{52} - 2 a_{11} n_2 w_{13} w_{41} w_{42} w_{51} w_{52} - 2 a_{12} n_2 w_{23} w_{41} w_{42} w_{51} w_{52} - \\
& 2 a_{21} n_2 w_{33} w_{41} w_{42} w_{51} w_{52} - 2 a_{22} n_2 w_{11} w_{12} w_{43} w_{51} w_{52} - a_{22} w_{11} w_{13} w_{43} w_{51} w_{52} - \\
& 2 a_{22} n_2 w_{21} w_{22} w_{43} w_{51} w_{52} - a_{22} w_{21} w_{23} w_{43} w_{51} w_{52} - 2 a_{22} n_2 w_{31} w_{32} w_{43} w_{51} w_{52} - \\
& a_{22} w_{31} w_{33} w_{43} w_{51} w_{52} + a_{11} n_2 w_{12} w_{41} w_{43} w_{51} w_{52} - a_{11} w_{13} w_{41} w_{43} w_{51} w_{52} + \\
& a_{12} n_2 w_{22} w_{41} w_{43} w_{51} w_{52} - a_{12} w_{23} w_{41} w_{43} w_{51} w_{52} + a_{21} n_2 w_{32} w_{41} w_{43} w_{51} w_{52} - \\
& a_{21} w_{33} w_{41} w_{43} w_{51} w_{52} + a_{11} n_2 w_{11} w_{42} w_{43} w_{51} w_{52} + a_{12} n_2 w_{21} w_{42} w_{43} w_{51} w_{52} + \\
& a_{21} n_2 w_{31} w_{42} w_{43} w_{51} w_{52} + a_{11} w_{11} w_{43}^2 w_{51} w_{52} + a_{12} w_{21} w_{43}^2 w_{51} w_{52} + \\
& a_{21} w_{31} w_{43}^2 w_{51} w_{52} - a_{12} n_2 w_{11} w_{13} w_{21} w_{52}^2 + a_{11} n_2 w_{13} w_{21}^2 w_{52}^2 + \\
& a_{12} n_2 w_{11}^2 w_{23} w_{52}^2 - a_{11} n_2 w_{11} w_{21} w_{23} w_{52}^2 - a_{21} n_2 w_{11} w_{13} w_{31} w_{52}^2 - \\
& a_{21} n_2 w_{21} w_{23} w_{31} w_{52}^2 + a_{11} n_2 w_{13} w_{31}^2 w_{52}^2 + a_{12} n_2 w_{23} w_{31}^2 w_{52}^2 + \\
& a_{21} n_2 w_{11}^2 w_{33} w_{52}^2 + a_{21} n_2 w_{21}^2 w_{33} w_{52}^2 - a_{11} n_2 w_{11} w_{31} w_{33} w_{52}^2 - \\
& a_{12} n_2 w_{21} w_{31} w_{33} w_{52}^2 - a_{22} n_2 w_{11} w_{13} w_{41} w_{52}^2 - a_{22} n_2 w_{21} w_{23} w_{41} w_{52}^2 - \\
& a_{22} n_2 w_{31} w_{33} w_{41} w_{52}^2 + a_{11} n_2 w_{13} w_{41}^2 w_{52}^2 + a_{12} n_2 w_{23} w_{41}^2 w_{52}^2 + \\
& a_{21} n_2 w_{33} w_{41}^2 w_{52}^2 + a_{22} n_2 w_{11}^2 w_{43} w_{52}^2 + a_{22} n_2 w_{21}^2 w_{43} w_{52}^2 + a_{22} n_2 w_{31}^2 w_{43} w_{52}^2 - \\
& a_{11} n_2 w_{11} w_{41} w_{43} w_{52}^2 - a_{12} n_2 w_{21} w_{41} w_{43} w_{52}^2 - a_{21} n_2 w_{31} w_{41} w_{43} w_{52}^2 + \\
& n_2 w_{12}^2 w_{21}^2 w_{53} + w_{12} w_{13} w_{21}^2 w_{53} - 2 n_2 w_{11} w_{12} w_{21} w_{22} w_{53} - w_{11} w_{13} w_{21} w_{22} w_{53} + \\
& n_2 w_{11}^2 w_{22}^2 w_{53} - w_{11} w_{12} w_{21} w_{23} w_{53} + w_{11}^2 w_{22} w_{23} w_{53} + n_2 w_{12}^2 w_{31}^2 w_{53} + \\
& w_{12} w_{13} w_{31}^2 w_{53} + n_2 w_{22}^2 w_{31}^2 w_{53} + w_{22} w_{23} w_{31}^2 w_{53} - 2 n_2 w_{11} w_{12} w_{31} w_{32} w_{53} - \\
& w_{11} w_{13} w_{31} w_{32} w_{53} - 2 n_2 w_{21} w_{22} w_{31} w_{32} w_{53} - w_{21} w_{23} w_{31} w_{32} w_{53} + \\
& n_2 w_{11}^2 w_{32}^2 w_{53} + n_2 w_{21}^2 w_{32}^2 w_{53} - w_{11} w_{12} w_{31} w_{33} w_{53} - w_{21} w_{22} w_{31} w_{33} w_{53} + \\
& w_{11}^2 w_{32} w_{33} w_{53} + w_{21}^2 w_{32} w_{33} w_{53} + n_2 w_{12}^2 w_{41}^2 w_{53} + w_{12} w_{13} w_{41}^2 w_{53} + \\
& n_2 w_{22}^2 w_{41}^2 w_{53} + w_{22} w_{23} w_{41}^2 w_{53} + n_2 w_{32}^2 w_{41}^2 w_{53} + w_{32} w_{33} w_{41}^2 w_{53} - \\
& 2 n_2 w_{11} w_{12} w_{41} w_{42} w_{53} - w_{11} w_{13} w_{41} w_{42} w_{53} - 2 n_2 w_{21} w_{22} w_{41} w_{42} w_{53} - \\
& w_{21} w_{23} w_{41} w_{42} w_{53} - 2 n_2 w_{31} w_{32} w_{41} w_{42} w_{53} - w_{31} w_{33} w_{41} w_{42} w_{53} + n_2 w_{11}^2 w_{42}^2 w_{53} + \\
& n_2 w_{21}^2 w_{42}^2 w_{53} + n_2 w_{31}^2 w_{42}^2 w_{53} - w_{11} w_{12} w_{41} w_{43} w_{53} - w_{21} w_{22} w_{41} w_{43} w_{53} - \\
& w_{31} w_{32} w_{41} w_{43} w_{53} + w_{11}^2 w_{42} w_{43} w_{53} + w_{21}^2 w_{42} w_{43} w_{53} + w_{31}^2 w_{42} w_{43} w_{53} - \\
& a_{12} n_2 w_{12}^2 w_{21} w_{51} w_{53} - a_{12} w_{12} w_{13} w_{21} w_{51} w_{53} + a_{12} n_2 w_{11} w_{12} w_{22} w_{51} w_{53} + \\
& 2 a_{12} w_{11} w_{13} w_{22} w_{51} w_{53} + a_{11} n_2 w_{12} w_{21} w_{22} w_{51} w_{53} - a_{11} w_{13} w_{21} w_{22} w_{51} w_{53} - \\
& a_{11} n_2 w_{11} w_{22}^2 w_{51} w_{53} - a_{12} w_{11} w_{12} w_{23} w_{51} w_{53} + 2 a_{11} w_{12} w_{21} w_{23} w_{51} w_{53} - \\
& a_{11} w_{11} w_{22} w_{23} w_{51} w_{53} - a_{21} n_2 w_{12}^2 w_{31} w_{51} w_{53} - a_{21} w_{12} w_{13} w_{31} w_{51} w_{53} - \\
& a_{21} n_2 w_{22}^2 w_{31} w_{51} w_{53} - a_{21} w_{22} w_{23} w_{31} w_{51} w_{53} + a_{21} n_2 w_{11} w_{12} w_{32} w_{51} w_{53} + \\
& 2 a_{21} w_{11} w_{13} w_{32} w_{51} w_{53} + a_{21} n_2 w_{21} w_{22} w_{32} w_{51} w_{53} + 2 a_{21} w_{21} w_{23} w_{32} w_{51} w_{53} + \\
& a_{11} n_2 w_{12} w_{31} w_{32} w_{51} w_{53} - a_{11} w_{13} w_{31} w_{32} w_{51} w_{53} + a_{12} n_2 w_{22} w_{31} w_{32} w_{51} w_{53} - \\
& a_{12} w_{23} w_{31} w_{32} w_{51} w_{53} - a_{11} n_2 w_{11} w_{32}^2 w_{51} w_{53} - a_{12} n_2 w_{21} w_{32}^2 w_{51} w_{53} - \\
& a_{21} w_{11} w_{12} w_{33} w_{51} w_{53} - a_{21} w_{21} w_{22} w_{33} w_{51} w_{53} + 2 a_{11} w_{12} w_{31} w_{33} w_{51} w_{53} + \\
& 2 a_{12} w_{22} w_{31} w_{33} w_{51} w_{53} - a_{11} w_{11} w_{32} w_{33} w_{51} w_{53} - a_{12} w_{21} w_{32} w_{33} w_{51} w_{53} - \\
& a_{22} n_2 w_{12}^2 w_{41} w_{51} w_{53} - a_{22} w_{12} w_{13} w_{41} w_{51} w_{53} - a_{22} n_2 w_{22}^2 w_{41} w_{51} w_{53} -
\end{aligned}$$

$$\begin{aligned}
& a22 w22 w23 w41 w51 w53 - a22 n2 w32^2 w41 w51 w53 - a22 w32 w33 w41 w51 w53 + \\
& a22 n2 w11 w12 w42 w51 w53 + 2 a22 w11 w13 w42 w51 w53 + a22 n2 w21 w22 w42 w51 w53 + \\
& 2 a22 w21 w23 w42 w51 w53 + a22 n2 w31 w32 w42 w51 w53 + 2 a22 w31 w33 w42 w51 w53 + \\
& a11 n2 w12 w41 w42 w51 w53 - a11 w13 w41 w42 w51 w53 + a12 n2 w22 w41 w42 w51 w53 - \\
& a12 w23 w41 w42 w51 w53 + a21 n2 w32 w41 w42 w51 w53 - a21 w33 w41 w42 w51 w53 - \\
& a11 n2 w11 w42^2 w51 w53 - a12 n2 w21 w42^2 w51 w53 - a21 n2 w31 w42^2 w51 w53 - \\
& a22 w11 w12 w43 w51 w53 - a22 w21 w22 w43 w51 w53 - a22 w31 w32 w43 w51 w53 + \\
& 2 a11 w12 w41 w43 w51 w53 + 2 a12 w22 w41 w43 w51 w53 + 2 a21 w32 w41 w43 w51 w53 - \\
& a11 w11 w42 w43 w51 w53 - a12 w21 w42 w43 w51 w53 - a21 w31 w42 w43 w51 w53 + \\
& a12 n2 w11 w12 w21 w52 w53 - a12 w11 w13 w21 w52 w53 - a11 n2 w12 w21^2 w52 w53 + \\
& a11 w13 w21^2 w52 w53 - a12 n2 w11^2 w22 w52 w53 + a11 n2 w11 w21 w22 w52 w53 + \\
& a12 w11^2 w23 w52 w53 - a11 w11 w21 w23 w52 w53 + a21 n2 w11 w12 w31 w52 w53 - \\
& a21 w11 w13 w31 w52 w53 + a21 n2 w21 w22 w31 w52 w53 - a21 w21 w23 w31 w52 w53 - \\
& a11 n2 w12 w31^2 w52 w53 + a11 w13 w31^2 w52 w53 - a12 n2 w22 w31^2 w52 w53 + \\
& a12 w23 w31^2 w52 w53 - a21 n2 w11^2 w32 w52 w53 - a21 n2 w21^2 w32 w52 w53 + \\
& a11 n2 w11 w31 w32 w52 w53 + a12 n2 w21 w31 w32 w52 w53 + a21 w11^2 w33 w52 w53 + \\
& a21 w21^2 w33 w52 w53 - a11 w11 w31 w33 w52 w53 - a12 w21 w31 w33 w52 w53 + \\
& a22 n2 w11 w12 w41 w52 w53 - a22 w11 w13 w41 w52 w53 + a22 n2 w21 w22 w41 w52 w53 - \\
& a22 w21 w23 w41 w52 w53 + a22 n2 w31 w32 w41 w52 w53 - a22 w31 w33 w41 w52 w53 - \\
& a11 n2 w12 w41^2 w52 w53 + a11 w13 w41^2 w52 w53 - a12 n2 w22 w41^2 w52 w53 + \\
& a12 w23 w41^2 w52 w53 - a21 n2 w32 w41^2 w52 w53 + a21 w33 w41^2 w52 w53 - \\
& a22 n2 w11^2 w42 w52 w53 - a22 n2 w21^2 w42 w52 w53 - a22 n2 w31^2 w42 w52 w53 + \\
& a11 n2 w11 w41 w42 w52 w53 + a12 n2 w21 w41 w42 w52 w53 + a21 n2 w31 w41 w42 w52 w53 + \\
& a22 w11^2 w43 w52 w53 + a22 w21^2 w43 w52 w53 + a22 w31^2 w43 w52 w53 - \\
& a11 w11 w41 w43 w52 w53 - a12 w21 w41 w43 w52 w53 - a21 w31 w41 w43 w52 w53 + \\
& a12 w11 w12 w21 w53^2 - a11 w12 w21^2 w53^2 - a12 w11^2 w22 w53^2 + a11 w11 w21 w22 w53^2 + \\
& a21 w11 w12 w31 w53^2 + a21 w21 w22 w31 w53^2 - a11 w12 w31^2 w53^2 - a12 w22 w31^2 w53^2 - \\
& a21 w11^2 w32 w53^2 - a21 w21^2 w32 w53^2 + a11 w11 w31 w32 w53^2 + a12 w21 w31 w32 w53^2 + \\
& a22 w11 w12 w41 w53^2 + a22 w21 w22 w41 w53^2 + a22 w31 w32 w41 w53^2 - a11 w12 w41^2 w53^2 - \\
& a12 w22 w41^2 w53^2 - a21 w32 w41^2 w53^2 - a22 w11^2 w42 w53^2 - a22 w21^2 w42 w53^2 - \\
& a22 w31^2 w42 w53^2 + a11 w11 w41 w42 w53^2 + a12 w21 w41 w42 w53^2 + a21 w31 w41 w42 w53^2
\end{aligned}$$

First we solve the equation  $\text{linear1} = 0$  for  $n2$  and substitute its solution into the “red” equation:

`Solve[linear1 == 0, n2]`

`Out[*] =`

$$\left\{ \left\{ n2 \rightarrow \frac{\begin{aligned} & (w11 w13 w51 + w21 w23 w51 + w31 w33 w51 + w41 w43 w51 - a11 w13 w51^2 - a12 w23 w51^2 - \\ & a21 w33 w51^2 - a22 w43 w51^2 - w11^2 w53 - w21^2 w53 - w31^2 w53 - w41^2 w53 + \\ & a11 w11 w51 w53 + a12 w21 w51 w53 + a21 w31 w51 w53 + a22 w41 w51 w53) \end{aligned}}{\begin{aligned} & (-w11 w12 w51 - w21 w22 w51 - w31 w32 w51 - w41 w42 w51 + a11 w12 w51^2 + \\ & a12 w22 w51^2 + a21 w32 w51^2 + a22 w42 w51^2 + w11^2 w52 + w21^2 w52 + w31^2 w52 + \\ & w41^2 w52 - a11 w11 w51 w52 - a12 w21 w51 w52 - a21 w31 w51 w52 - a22 w41 w51 w52) \end{aligned}} \right\} \right\}$$

```

In[*]:= n1 → - ( (-w132 w51 - w232 w51 - w332 w51 - w432 w51 +
n22 (-w122 w51 - w222 w51 - w322 w51 - w422 w51 + w31 w32 w52 + w41 w42 w52 + a21
w32 w51 w52 + a22 w42 w51 w52 + w12 (w11 + a11 w51) w52 + w22 (w21 + a12 w51)
w52 - a11 w11 w522 - a12 w21 w522 - a21 w31 w522 - a22 w41 w522) +
w21 w23 w53 + w31 w33 w53 + w41 w43 w53 + a12 w23 w51 w53 +
a21 w33 w51 w53 + a22 w43 w51 w53 + w13 (w11 + a11 w51) w53 -
a11 w11 w532 - a12 w21 w532 - a21 w31 w532 - a22 w41 w532 +
n2 (-2 w12 w13 w51 - 2 w22 w23 w51 - 2 w32 w33 w51 - 2 w42 w43 w51 +
w11 w13 w52 + w21 w23 w52 + w31 w33 w52 + w41 w43 w52 + a11 w13 w51 w52 +
a12 w23 w51 w52 + a21 w33 w51 w52 + a22 w43 w51 w52 +
w31 w32 w53 + w41 w42 w53 + a21 w32 w51 w53 + a22 w42 w51 w53 +
w12 (w11 + a11 w51) w53 + w22 (w21 + a12 w51) w53 - 2 a11 w11 w52 w53 -
2 a12 w21 w52 w53 - 2 a21 w31 w52 w53 - 2 a22 w41 w52 w53) ) /
(-w21 w23 w51 - w31 w33 w51 - w41 w43 w51 + a11 w13 w512 + a12 w23 w512 +
a21 w33 w512 + a22 w43 w512 +
n2 (-w31 w32 w51 - w41 w42 w51 + a11 w12 w512 + a12 w22 w512 + a21 w32 w512 +
a22 w42 w512 + w112 w52 + w212 w52 + w312 w52 + w412 w52 - a21 w31 w51 w52 -
a22 w41 w51 w52 - w11 w51 (w12 + a11 w52) - w21 w51 (w22 + a12 w52) ) +
w112 w53 + w212 w53 + w312 w53 + w412 w53 - a12 w21 w51 w53 -
a21 w31 w51 w53 - a22 w41 w51 w53 - w11 w51 (w13 + a11 w53) ) ) / .
n2 → (w11 w13 w51 + w21 w23 w51 + w31 w33 w51 + w41 w43 w51 - a11 w13 w512 -
a12 w23 w512 - a21 w33 w512 - a22 w43 w512 - w112 w53 -
w212 w53 - w312 w53 - w412 w53 + a11 w11 w51 w53 +
a12 w21 w51 w53 + a21 w31 w51 w53 + a22 w41 w51 w53) /
(-w11 w12 w51 - w21 w22 w51 - w31 w32 w51 - w41 w42 w51 + a11 w12 w512 +
a12 w22 w512 + a21 w32 w512 + a22 w42 w512 + w112 w52 + w212 w52 +
w312 w52 + w412 w52 - a11 w11 w51 w52 - a12 w21 w51 w52 -
a21 w31 w51 w52 - a22 w41 w51 w52) // Simplify

```

... Simplify : Expression

$$\begin{aligned}
& - \left( \frac{\langle\langle 22 \rangle\rangle + \frac{(\langle\langle 1 \rangle\rangle) \langle\langle 1 \rangle\rangle^2}{(\langle\langle 1 \rangle\rangle)^2}}{(\langle\langle 1 \rangle\rangle)^2} + ((w11 w13 w51 + w21 w23 w51 + w31 w33 w51 + \langle\langle 17 \rangle\rangle + a11 w11 w51 w53 + \right. \\
& \quad a12 w21 w51 w53 + a21 w31 w51 w53 + a22 w41 w51 w53) (\langle\langle 1 \rangle\rangle)) / (-w11 w12 w51 - w21 \\
& \quad w22 w51 - w31 w32 w51 - w41 w42 w51 + a11 w12 w51^2 + \langle\langle 6 \rangle\rangle + w41^2 w52 - a11 w11 w51 \\
& \quad w52 - a12 w21 w51 w52 - a21 w31 w51 w52 - a22 w41 w51 w52) \Big) / (\langle\langle 21 \rangle\rangle + ((-w31 w32 \\
& \quad w51 - w41 w42 w51 + a11 w12 w51^2 + a12 w22 w51^2 + \langle\langle 14 \rangle\rangle) (w11 w13 w51 + w21 w23 \\
& \quad w51 + w31 w33 w51 + \langle\langle 19 \rangle\rangle + a21 w31 w51 w53 + a22 w41 w51 w53) / (-w11 w12 \\
& \quad w51 - w21 w22 w51 - w31 w32 w51 - w41 w42 w51 + a11 w12 \text{Power} [\langle\langle 2 \rangle\rangle] + \langle\langle 6 \rangle\rangle + \langle\langle 1 \\
& \quad \rangle\rangle - a11 w11 w51 w52 - a12 w21 w51 w52 - a21 w31 w51 w52 - a22 w41 w51 w52) \Big)
\end{aligned}$$

simplified to ComplexInfinity.

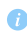

Out[\*]=

n1 → ComplexInfinity

This means that the solution of  $\text{linear1} = 0$  would yield a formula that makes a denominator identically equal to 0, hence the equation  $\text{linear1} = 0$  cannot yield the optimal solution.

We thus have to deal with the only remaining candidate,  $\text{linear2} = 0$ .

We solve this equation for  $n2$  and get formula (8):

**Solve[linear2 == 0, n2]**

Out[\*]=

$$\left\{ \left\{ n2 \rightarrow \left( -w_{13}^2 w_{21} w_{22} w_{51} + w_{12} w_{13} w_{21} w_{23} w_{51} + w_{11} w_{13} w_{22} w_{23} w_{51} - w_{11} w_{12} w_{23}^2 w_{51} - w_{13}^2 w_{31} w_{32} w_{51} - w_{23}^2 w_{31} w_{32} w_{51} + w_{12} w_{13} w_{31} w_{33} w_{51} + w_{22} w_{23} w_{31} w_{33} w_{51} + w_{11} w_{13} w_{32} w_{33} w_{51} + w_{21} w_{23} w_{32} w_{33} w_{51} - w_{11} w_{12} w_{33}^2 w_{51} - w_{21} w_{22} w_{33}^2 w_{51} - w_{13}^2 w_{41} w_{42} w_{51} - w_{23}^2 w_{41} w_{42} w_{51} - w_{33}^2 w_{41} w_{42} w_{51} + w_{12} w_{13} w_{41} w_{43} w_{51} + w_{22} w_{23} w_{41} w_{43} w_{51} + w_{32} w_{33} w_{41} w_{43} w_{51} + w_{11} w_{13} w_{42} w_{43} w_{51} + w_{21} w_{23} w_{42} w_{43} w_{51} + w_{31} w_{33} w_{42} w_{43} w_{51} - w_{11} w_{12} w_{43}^2 w_{51} - w_{21} w_{22} w_{43}^2 w_{51} - w_{31} w_{32} w_{43}^2 w_{51} + a_{12} w_{13}^2 w_{22} w_{51}^2 - a_{12} w_{12} w_{13} w_{23} w_{51}^2 - a_{11} w_{13} w_{22} w_{23} w_{51}^2 + a_{11} w_{12} w_{23}^2 w_{51}^2 + a_{21} w_{13}^2 w_{32} w_{51}^2 + a_{21} w_{23}^2 w_{32} w_{51}^2 - a_{21} w_{12} w_{13} w_{33} w_{51}^2 - a_{21} w_{22} w_{23} w_{33} w_{51}^2 - a_{11} w_{13} w_{32} w_{33} w_{51}^2 - a_{12} w_{23} w_{32} w_{33} w_{51}^2 + a_{11} w_{12} w_{33}^2 w_{51}^2 + a_{12} w_{22} w_{33}^2 w_{51}^2 + a_{22} w_{13}^2 w_{42} w_{51}^2 + a_{22} w_{23}^2 w_{42} w_{51}^2 - a_{22} w_{12} w_{13} w_{43} w_{51}^2 - a_{22} w_{22} w_{23} w_{43} w_{51}^2 - a_{22} w_{32} w_{33} w_{43} w_{51}^2 - a_{11} w_{13} w_{42} w_{43} w_{51}^2 - a_{12} w_{23} w_{42} w_{43} w_{51}^2 - a_{21} w_{33} w_{42} w_{43} w_{51}^2 + a_{11} w_{12} w_{43}^2 w_{51}^2 + a_{12} w_{22} w_{43}^2 w_{51}^2 + a_{21} w_{32} w_{43}^2 w_{51}^2 + w_{13}^2 w_{21}^2 w_{52} - 2 w_{11} w_{13} w_{21} w_{23} w_{52} + w_{11}^2 w_{23}^2 w_{52} + w_{13}^2 w_{31}^2 w_{52} + w_{23}^2 w_{31}^2 w_{52} - 2 w_{11} w_{13} w_{31} w_{33} w_{52} - 2 w_{21} w_{23} w_{31} w_{33} w_{52} + w_{11}^2 w_{33}^2 w_{52} + w_{21}^2 w_{33}^2 w_{52} + w_{13}^2 w_{41}^2 w_{52} + w_{23}^2 w_{41}^2 w_{52} + w_{33}^2 w_{41}^2 w_{52} - 2 w_{11} w_{13} w_{41} w_{43} w_{52} - 2 w_{21} w_{23} w_{41} w_{43} w_{52} - 2 w_{31} w_{33} w_{41} w_{43} w_{52} + w_{11}^2 w_{43}^2 w_{52} + w_{21}^2 w_{43}^2 w_{52} + w_{31}^2 w_{43}^2 w_{52} - a_{12} w_{13}^2 w_{21} w_{51} w_{52} + a_{12} w_{11} w_{13} w_{23} w_{51} w_{52} + a_{11} w_{13} w_{21} w_{23} w_{51} w_{52} - a_{11} w_{11} w_{23}^2 w_{51} w_{52} - a_{21} w_{13}^2 w_{31} w_{51} w_{52} - a_{21} w_{23}^2 w_{31} w_{51} w_{52} + a_{21} w_{11} w_{13} w_{33} w_{51} w_{52} + a_{21} w_{21} w_{23} w_{33} w_{51} w_{52} + a_{11} w_{13} w_{31} w_{33} w_{51} w_{52} + a_{12} w_{23} w_{31} w_{33} w_{51} w_{52} - a_{11} w_{11} w_{33}^2 w_{51} w_{52} - a_{12} w_{21} w_{33}^2 w_{51} w_{52} - a_{22} w_{13}^2 w_{41} w_{51} w_{52} - a_{22} w_{23}^2 w_{41} w_{51} w_{52} - a_{22} w_{33}^2 w_{41} w_{51} w_{52} + a_{22} w_{11} w_{13} w_{43} w_{51} w_{52} + a_{22} w_{21} w_{23} w_{43} w_{51} w_{52} + a_{22} w_{31} w_{33} w_{43} w_{51} w_{52} + a_{11} w_{13} w_{41} w_{43} w_{51} w_{52} + a_{12} w_{23} w_{41} w_{43} w_{51} w_{52} + a_{21} w_{33} w_{41} w_{43} w_{51} w_{52} - a_{11} w_{11} w_{43}^2 w_{51} w_{52} - a_{12} w_{21} w_{43}^2 w_{51} w_{52} - a_{21} w_{31} w_{43}^2 w_{51} w_{52} - w_{12} w_{13} w_{21}^2 w_{53} + w_{11} w_{13} w_{21} w_{22} w_{53} + w_{11} w_{12} w_{21} w_{23} w_{53} - w_{11}^2 w_{22} w_{23} w_{53} - w_{12} w_{13} w_{31}^2 w_{53} - w_{22} w_{23} w_{31}^2 w_{53} + w_{11} w_{13} w_{31} w_{32} w_{53} + w_{21} w_{23} w_{31} w_{32} w_{53} + w_{11} w_{12} w_{31} w_{33} w_{53} + w_{21} w_{22} w_{31} w_{33} w_{53} - w_{11}^2 w_{32} w_{33} w_{53} - w_{21}^2 w_{32} w_{33} w_{53} - w_{12} w_{13} w_{41}^2 w_{53} - w_{22} w_{23} w_{41}^2 w_{53} - w_{32} w_{33} w_{41}^2 w_{53} + w_{11} w_{13} w_{41} w_{42} w_{53} + w_{21} w_{23} w_{41} w_{42} w_{53} + w_{31} w_{33} w_{41} w_{42} w_{53} + w_{11} w_{12} w_{41} w_{43} w_{53} + w_{21} w_{22} w_{41} w_{43} w_{53} + w_{31} w_{32} w_{41} w_{43} w_{53} - w_{11}^2 w_{42} w_{43} w_{53} - w_{21}^2 w_{42} w_{43} w_{53} - w_{31}^2 w_{42} w_{43} w_{53} + a_{12} w_{12} w_{13} w_{21} w_{51} w_{53} - 2 a_{12} w_{11} w_{13} w_{22} w_{51} w_{53} + a_{11} w_{13} w_{21} w_{22} w_{51} w_{53} + a_{12} w_{11} w_{12} w_{23} w_{51} w_{53} - 2 a_{11} w_{12} w_{21} w_{23} w_{51} w_{53} + a_{11} w_{11} w_{22} w_{23} w_{51} w_{53} + a_{21} w_{12} w_{13} w_{31} w_{51} w_{53} + a_{21} w_{22} w_{23} w_{31} w_{51} w_{53} - 2 a_{21} w_{11} w_{13} w_{32} w_{51} w_{53} - 2 a_{21} w_{21} w_{23} w_{32} w_{51} w_{53} + a_{11} w_{13} w_{31} w_{32} w_{51} w_{53} + a_{12} w_{23} w_{31} w_{32} w_{51} w_{53} + a_{21} w_{11} w_{12} w_{33} w_{51} w_{53} + a_{21} w_{21} w_{22} w_{33} w_{51} w_{53} - 2 a_{11} w_{12} w_{31} w_{33} w_{51} w_{53} - 2 a_{12} w_{22} w_{31} w_{33} w_{51} w_{53} + a_{11} w_{11} w_{32} w_{33} w_{51} w_{53} + a_{12} w_{21} w_{32} w_{33} w_{51} w_{53} + a_{22} w_{12} w_{13} w_{41} w_{51} w_{53} + a_{22} w_{22} w_{23} w_{41} w_{51} w_{53} + a_{22} w_{32} w_{33} w_{41} w_{51} w_{53} - 2 a_{22} w_{11} w_{13} w_{42} w_{51} w_{53} - 2 a_{22} w_{21} w_{23} w_{42} w_{51} w_{53} - 2 a_{22} w_{31} w_{33} w_{42} w_{51} w_{53} + a_{11} w_{13} w_{41} w_{42} w_{51} w_{53} + a_{12} w_{23} w_{41} w_{42} w_{51} w_{53} +$$

$$\begin{aligned}
& a_{21} w_{33} w_{41} w_{42} w_{51} w_{53} + a_{22} w_{11} w_{12} w_{43} w_{51} w_{53} + a_{22} w_{21} w_{22} w_{43} w_{51} w_{53} + \\
& a_{22} w_{31} w_{32} w_{43} w_{51} w_{53} - 2 a_{11} w_{12} w_{41} w_{43} w_{51} w_{53} - 2 a_{12} w_{22} w_{41} w_{43} w_{51} w_{53} - \\
& 2 a_{21} w_{32} w_{41} w_{43} w_{51} w_{53} + a_{11} w_{11} w_{42} w_{43} w_{51} w_{53} + a_{12} w_{21} w_{42} w_{43} w_{51} w_{53} + \\
& a_{21} w_{31} w_{42} w_{43} w_{51} w_{53} + a_{12} w_{11} w_{13} w_{21} w_{52} w_{53} - a_{11} w_{13} w_{21}^2 w_{52} w_{53} - \\
& a_{12} w_{11}^2 w_{23} w_{52} w_{53} + a_{11} w_{11} w_{21} w_{23} w_{52} w_{53} + a_{21} w_{11} w_{13} w_{31} w_{52} w_{53} + \\
& a_{21} w_{21} w_{23} w_{31} w_{52} w_{53} - a_{11} w_{13} w_{31}^2 w_{52} w_{53} - a_{12} w_{23} w_{31}^2 w_{52} w_{53} - \\
& a_{21} w_{11}^2 w_{33} w_{52} w_{53} - a_{21} w_{21}^2 w_{33} w_{52} w_{53} + a_{11} w_{11} w_{31} w_{33} w_{52} w_{53} + \\
& a_{12} w_{21} w_{31} w_{33} w_{52} w_{53} + a_{22} w_{11} w_{13} w_{41} w_{52} w_{53} + a_{22} w_{21} w_{23} w_{41} w_{52} w_{53} + \\
& a_{22} w_{31} w_{33} w_{41} w_{52} w_{53} - a_{11} w_{13} w_{41}^2 w_{52} w_{53} - a_{12} w_{23} w_{41}^2 w_{52} w_{53} - \\
& a_{21} w_{33} w_{41}^2 w_{52} w_{53} - a_{22} w_{11}^2 w_{43} w_{52} w_{53} - a_{22} w_{21}^2 w_{43} w_{52} w_{53} - \\
& a_{22} w_{31}^2 w_{43} w_{52} w_{53} + a_{11} w_{11} w_{41} w_{43} w_{52} w_{53} + a_{12} w_{21} w_{41} w_{43} w_{52} w_{53} + \\
& a_{21} w_{31} w_{41} w_{43} w_{52} w_{53} - a_{12} w_{11} w_{12} w_{21} w_{53}^2 + a_{11} w_{12} w_{21}^2 w_{53}^2 + \\
& a_{12} w_{11}^2 w_{22} w_{53}^2 - a_{11} w_{11} w_{21} w_{22} w_{53}^2 - a_{21} w_{11} w_{12} w_{31} w_{53}^2 - \\
& a_{21} w_{21} w_{22} w_{31} w_{53}^2 + a_{11} w_{12} w_{31}^2 w_{53}^2 + a_{12} w_{22} w_{31}^2 w_{53}^2 + \\
& a_{21} w_{11}^2 w_{32} w_{53}^2 + a_{21} w_{21}^2 w_{32} w_{53}^2 - a_{11} w_{11} w_{31} w_{32} w_{53}^2 - \\
& a_{12} w_{21} w_{31} w_{32} w_{53}^2 - a_{22} w_{11} w_{12} w_{41} w_{53}^2 - a_{22} w_{21} w_{22} w_{41} w_{53}^2 - \\
& a_{22} w_{31} w_{32} w_{41} w_{53}^2 + a_{11} w_{12} w_{41}^2 w_{53}^2 + a_{12} w_{22} w_{41}^2 w_{53}^2 + \\
& a_{21} w_{32} w_{41}^2 w_{53}^2 + a_{22} w_{11}^2 w_{42} w_{53}^2 + a_{22} w_{21}^2 w_{42} w_{53}^2 + a_{22} w_{31}^2 w_{42} w_{53}^2 - \\
& a_{11} w_{11} w_{41} w_{42} w_{53}^2 - a_{12} w_{21} w_{41} w_{42} w_{53}^2 - a_{21} w_{31} w_{41} w_{42} w_{53}^2) / \\
& (w_{12} w_{13} w_{21} w_{22} w_{51} - w_{11} w_{13} w_{22}^2 w_{51} - w_{12}^2 w_{21} w_{23} w_{51} + w_{11} w_{12} w_{22} w_{23} w_{51} + \\
& w_{12} w_{13} w_{31} w_{32} w_{51} + w_{22} w_{23} w_{31} w_{32} w_{51} - w_{11} w_{13} w_{32}^2 w_{51} - w_{21} w_{23} w_{32}^2 w_{51} - \\
& w_{12}^2 w_{31} w_{33} w_{51} - w_{22}^2 w_{31} w_{33} w_{51} + w_{11} w_{12} w_{32} w_{33} w_{51} + w_{21} w_{22} w_{32} w_{33} w_{51} + \\
& w_{12} w_{13} w_{41} w_{42} w_{51} + w_{22} w_{23} w_{41} w_{42} w_{51} + w_{32} w_{33} w_{41} w_{42} w_{51} - \\
& w_{11} w_{13} w_{42}^2 w_{51} - w_{21} w_{23} w_{42}^2 w_{51} - w_{31} w_{33} w_{42}^2 w_{51} - w_{12}^2 w_{41} w_{43} w_{51} - \\
& w_{22}^2 w_{41} w_{43} w_{51} - w_{32}^2 w_{41} w_{43} w_{51} + w_{11} w_{12} w_{42} w_{43} w_{51} + w_{21} w_{22} w_{42} w_{43} w_{51} + \\
& w_{31} w_{32} w_{42} w_{43} w_{51} - a_{12} w_{12} w_{13} w_{22} w_{51}^2 + a_{11} w_{13} w_{22}^2 w_{51}^2 + a_{12} w_{12}^2 w_{23} w_{51}^2 - \\
& a_{11} w_{12} w_{22} w_{23} w_{51}^2 - a_{21} w_{12} w_{13} w_{32} w_{51}^2 - a_{21} w_{22} w_{23} w_{32} w_{51}^2 + \\
& a_{11} w_{13} w_{32}^2 w_{51}^2 + a_{12} w_{23} w_{32}^2 w_{51}^2 + a_{21} w_{12}^2 w_{33} w_{51}^2 + a_{21} w_{22}^2 w_{33} w_{51}^2 - \\
& a_{11} w_{12} w_{32} w_{33} w_{51}^2 - a_{12} w_{22} w_{32} w_{33} w_{51}^2 - a_{22} w_{12} w_{13} w_{42} w_{51}^2 - \\
& a_{22} w_{22} w_{23} w_{42} w_{51}^2 - a_{22} w_{32} w_{33} w_{42} w_{51}^2 + a_{11} w_{13} w_{42}^2 w_{51}^2 + \\
& a_{12} w_{23} w_{42}^2 w_{51}^2 + a_{21} w_{33} w_{42}^2 w_{51}^2 + a_{22} w_{12}^2 w_{43} w_{51}^2 + a_{22} w_{22}^2 w_{43} w_{51}^2 + \\
& a_{22} w_{32}^2 w_{43} w_{51}^2 - a_{11} w_{12} w_{42} w_{43} w_{51}^2 - a_{12} w_{22} w_{42} w_{43} w_{51}^2 - \\
& a_{21} w_{32} w_{42} w_{43} w_{51}^2 - w_{12} w_{13} w_{21}^2 w_{52} + w_{11} w_{13} w_{21} w_{22} w_{52} + \\
& w_{11} w_{12} w_{21} w_{23} w_{52} - w_{11}^2 w_{22} w_{23} w_{52} - w_{12} w_{13} w_{31}^2 w_{52} - w_{22} w_{23} w_{31}^2 w_{52} + \\
& w_{11} w_{13} w_{31} w_{32} w_{52} + w_{21} w_{23} w_{31} w_{32} w_{52} + w_{11} w_{12} w_{31} w_{33} w_{52} + \\
& w_{21} w_{22} w_{31} w_{33} w_{52} - w_{11}^2 w_{32} w_{33} w_{52} - w_{21}^2 w_{32} w_{33} w_{52} - w_{12} w_{13} w_{41}^2 w_{52} - \\
& w_{22} w_{23} w_{41}^2 w_{52} - w_{32} w_{33} w_{41}^2 w_{52} + w_{11} w_{13} w_{41} w_{42} w_{52} + w_{21} w_{23} w_{41} w_{42} w_{52} + \\
& w_{31} w_{33} w_{41} w_{42} w_{52} + w_{11} w_{12} w_{41} w_{43} w_{52} + w_{21} w_{22} w_{41} w_{43} w_{52} + \\
& w_{31} w_{32} w_{41} w_{43} w_{52} - w_{11}^2 w_{42} w_{43} w_{52} - w_{21}^2 w_{42} w_{43} w_{52} - w_{31}^2 w_{42} w_{43} w_{52} + \\
& a_{12} w_{12} w_{13} w_{21} w_{51} w_{52} + a_{12} w_{11} w_{13} w_{22} w_{51} w_{52} - 2 a_{11} w_{13} w_{21} w_{22} w_{51} w_{52} - \\
& 2 a_{12} w_{11} w_{12} w_{23} w_{51} w_{52} + a_{11} w_{12} w_{21} w_{23} w_{51} w_{52} + a_{11} w_{11} w_{22} w_{23} w_{51} w_{52} + \\
& a_{21} w_{12} w_{13} w_{31} w_{51} w_{52} + a_{21} w_{22} w_{23} w_{31} w_{51} w_{52} + a_{21} w_{11} w_{13} w_{32} w_{51} w_{52} + \\
& a_{21} w_{21} w_{23} w_{32} w_{51} w_{52} - 2 a_{11} w_{13} w_{31} w_{32} w_{51} w_{52} - 2 a_{12} w_{23} w_{31} w_{32} w_{51} w_{52} - \\
& 2 a_{21} w_{11} w_{12} w_{33} w_{51} w_{52} - 2 a_{21} w_{21} w_{22} w_{33} w_{51} w_{52} + a_{11} w_{12} w_{31} w_{33} w_{51} w_{52} + \\
& a_{12} w_{22} w_{31} w_{33} w_{51} w_{52} + a_{11} w_{11} w_{32} w_{33} w_{51} w_{52} + a_{12} w_{21} w_{32} w_{33} w_{51} w_{52} + \\
& a_{22} w_{12} w_{13} w_{41} w_{51} w_{52} + a_{22} w_{22} w_{23} w_{41} w_{51} w_{52} + a_{22} w_{32} w_{33} w_{41} w_{51} w_{52} + \\
& a_{22} w_{11} w_{13} w_{42} w_{51} w_{52} + a_{22} w_{21} w_{23} w_{42} w_{51} w_{52} + a_{22} w_{31} w_{33} w_{42} w_{51} w_{52} -
\end{aligned}$$



$$\begin{aligned}
& 2 a_{11} w_{13} w_{41} w_{42} w_{51} w_{52} - 2 a_{12} w_{23} w_{41} w_{42} w_{51} w_{52} - 2 a_{21} w_{33} w_{41} w_{42} w_{51} w_{52} - \\
& 2 a_{22} w_{11} w_{12} w_{43} w_{51} w_{52} - 2 a_{22} w_{21} w_{22} w_{43} w_{51} w_{52} - 2 a_{22} w_{31} w_{32} w_{43} w_{51} w_{52} + \\
& a_{11} w_{12} w_{41} w_{43} w_{51} w_{52} + a_{12} w_{22} w_{41} w_{43} w_{51} w_{52} + a_{21} w_{32} w_{41} w_{43} w_{51} w_{52} + \\
& a_{11} w_{11} w_{42} w_{43} w_{51} w_{52} + a_{12} w_{21} w_{42} w_{43} w_{51} w_{52} + a_{21} w_{31} w_{42} w_{43} w_{51} w_{52} - \\
& a_{12} w_{11} w_{13} w_{21} w_{52}^2 + a_{11} w_{13} w_{21}^2 w_{52}^2 + a_{12} w_{11}^2 w_{23} w_{52}^2 - \\
& a_{11} w_{11} w_{21} w_{23} w_{52}^2 - a_{21} w_{11} w_{13} w_{31} w_{52}^2 - a_{21} w_{21} w_{23} w_{31} w_{52}^2 + \\
& a_{11} w_{13} w_{31}^2 w_{52}^2 + a_{12} w_{23} w_{31}^2 w_{52}^2 + a_{21} w_{11}^2 w_{33} w_{52}^2 + a_{21} w_{21}^2 w_{33} w_{52}^2 - \\
& a_{11} w_{11} w_{31} w_{33} w_{52}^2 - a_{12} w_{21} w_{31} w_{33} w_{52}^2 - a_{22} w_{11} w_{13} w_{41} w_{52}^2 - \\
& a_{22} w_{21} w_{23} w_{41} w_{52}^2 - a_{22} w_{31} w_{33} w_{41} w_{52}^2 + a_{11} w_{13} w_{41}^2 w_{52}^2 + \\
& a_{12} w_{23} w_{41}^2 w_{52}^2 + a_{21} w_{33} w_{41}^2 w_{52}^2 + a_{22} w_{11}^2 w_{43} w_{52}^2 + a_{22} w_{21}^2 w_{43} w_{52}^2 + \\
& a_{22} w_{31}^2 w_{43} w_{52}^2 - a_{11} w_{11} w_{41} w_{43} w_{52}^2 - a_{12} w_{21} w_{41} w_{43} w_{52}^2 - \\
& a_{21} w_{31} w_{41} w_{43} w_{52}^2 + w_{12}^2 w_{21}^2 w_{53} - 2 w_{11} w_{12} w_{21} w_{22} w_{53} + \\
& w_{11}^2 w_{22}^2 w_{53} + w_{12}^2 w_{31}^2 w_{53} + w_{22}^2 w_{31}^2 w_{53} - 2 w_{11} w_{12} w_{31} w_{32} w_{53} - \\
& 2 w_{21} w_{22} w_{31} w_{32} w_{53} + w_{11}^2 w_{32}^2 w_{53} + w_{21}^2 w_{32}^2 w_{53} + w_{12}^2 w_{41}^2 w_{53} + \\
& w_{22}^2 w_{41}^2 w_{53} + w_{32}^2 w_{41}^2 w_{53} - 2 w_{11} w_{12} w_{41} w_{42} w_{53} - 2 w_{21} w_{22} w_{41} w_{42} w_{53} - \\
& 2 w_{31} w_{32} w_{41} w_{42} w_{53} + w_{11}^2 w_{42}^2 w_{53} + w_{21}^2 w_{42}^2 w_{53} + w_{31}^2 w_{42}^2 w_{53} - \\
& a_{12} w_{12}^2 w_{21} w_{51} w_{53} + a_{12} w_{11} w_{12} w_{22} w_{51} w_{53} + a_{11} w_{12} w_{21} w_{22} w_{51} w_{53} - \\
& a_{11} w_{11} w_{22}^2 w_{51} w_{53} - a_{21} w_{12}^2 w_{31} w_{51} w_{53} - a_{21} w_{22}^2 w_{31} w_{51} w_{53} + \\
& a_{21} w_{11} w_{12} w_{32} w_{51} w_{53} + a_{21} w_{21} w_{22} w_{32} w_{51} w_{53} + a_{11} w_{12} w_{31} w_{32} w_{51} w_{53} + \\
& a_{12} w_{22} w_{31} w_{32} w_{51} w_{53} - a_{11} w_{11} w_{32}^2 w_{51} w_{53} - a_{12} w_{21} w_{32}^2 w_{51} w_{53} - \\
& a_{22} w_{12}^2 w_{41} w_{51} w_{53} - a_{22} w_{22}^2 w_{41} w_{51} w_{53} - a_{22} w_{32}^2 w_{41} w_{51} w_{53} + \\
& a_{22} w_{11} w_{12} w_{42} w_{51} w_{53} + a_{22} w_{21} w_{22} w_{42} w_{51} w_{53} + a_{22} w_{31} w_{32} w_{42} w_{51} w_{53} + \\
& a_{11} w_{12} w_{41} w_{42} w_{51} w_{53} + a_{12} w_{22} w_{41} w_{42} w_{51} w_{53} + a_{21} w_{32} w_{41} w_{42} w_{51} w_{53} - \\
& a_{11} w_{11} w_{42}^2 w_{51} w_{53} - a_{12} w_{21} w_{42}^2 w_{51} w_{53} - a_{21} w_{31} w_{42}^2 w_{51} w_{53} + \\
& a_{12} w_{11} w_{12} w_{21} w_{52} w_{53} - a_{11} w_{12} w_{21}^2 w_{52} w_{53} - a_{12} w_{11}^2 w_{22} w_{52} w_{53} + \\
& a_{11} w_{11} w_{21} w_{22} w_{52} w_{53} + a_{21} w_{11} w_{12} w_{31} w_{52} w_{53} + a_{21} w_{21} w_{22} w_{31} w_{52} w_{53} - \\
& a_{11} w_{12} w_{31}^2 w_{52} w_{53} - a_{12} w_{22} w_{31}^2 w_{52} w_{53} - a_{21} w_{11}^2 w_{32} w_{52} w_{53} - \\
& a_{21} w_{21}^2 w_{32} w_{52} w_{53} + a_{11} w_{11} w_{31} w_{32} w_{52} w_{53} + a_{12} w_{21} w_{31} w_{32} w_{52} w_{53} + \\
& a_{22} w_{11} w_{12} w_{41} w_{52} w_{53} + a_{22} w_{21} w_{22} w_{41} w_{52} w_{53} + a_{22} w_{31} w_{32} w_{41} w_{52} w_{53} - \\
& a_{11} w_{12} w_{41}^2 w_{52} w_{53} - a_{12} w_{22} w_{41}^2 w_{52} w_{53} - a_{21} w_{32} w_{41}^2 w_{52} w_{53} - \\
& a_{22} w_{11}^2 w_{42} w_{52} w_{53} - a_{22} w_{21}^2 w_{42} w_{52} w_{53} - a_{22} w_{31}^2 w_{42} w_{52} w_{53} + \\
& a_{11} w_{11} w_{41} w_{42} w_{52} w_{53} + a_{12} w_{21} w_{41} w_{42} w_{52} w_{53} + a_{21} w_{31} w_{41} w_{42} w_{52} w_{53} \} \}
\end{aligned}$$

This yields the second component of the optimal vector  $\mathbf{n}_g^*$  in Case A.

If we now substitute this last “yellow” expression into the “red” expression for  $n_1$ , we obtain the first component of the optimal vector  $\mathbf{n}_g^*$  in Case A.

## Case B, $n_3=0$

We make the substitution  $n_3 = 0$ :

$$\text{In[*]} := \left( a_{11} - \frac{n_1 w_{11} + n_2 w_{12} + n_3 w_{13}}{n_1 w_{51} + n_2 w_{52} + n_3 w_{53}} \right)^2 + \left( a_{12} - \frac{n_1 w_{21} + n_2 w_{22} + n_3 w_{23}}{n_1 w_{51} + n_2 w_{52} + n_3 w_{53}} \right)^2 +$$

$$\left( a_{21} - \frac{n_1 w_{31} + n_2 w_{32} + n_3 w_{33}}{n_1 w_{51} + n_2 w_{52} + n_3 w_{53}} \right)^2 + \left( a_{22} - \frac{n_1 w_{41} + n_2 w_{42} + n_3 w_{43}}{n_1 w_{51} + n_2 w_{52} + n_3 w_{53}} \right)^2 \text{ /. } n_3 \rightarrow 0$$

Out[\*] =

$$\left( a_{11} - \frac{n_1 w_{11} + n_2 w_{12}}{n_1 w_{51} + n_2 w_{52}} \right)^2 + \left( a_{12} - \frac{n_1 w_{21} + n_2 w_{22}}{n_1 w_{51} + n_2 w_{52}} \right)^2 +$$

$$\left( a_{21} - \frac{n_1 w_{31} + n_2 w_{32}}{n_1 w_{51} + n_2 w_{52}} \right)^2 + \left( a_{22} - \frac{n_1 w_{41} + n_2 w_{42}}{n_1 w_{51} + n_2 w_{52}} \right)^2$$

We compute its partial derivative w.r.t. the first variable (that is,  $\partial_1 h(n_x, n_y)$ ):

$$\text{In[*]} := \text{D} \left[ \left( a_{11} - \frac{n_1 w_{11} + n_2 w_{12}}{n_1 w_{51} + n_2 w_{52}} \right)^2 + \left( a_{12} - \frac{n_1 w_{21} + n_2 w_{22}}{n_1 w_{51} + n_2 w_{52}} \right)^2 + \right.$$

$$\left. \left( a_{21} - \frac{n_1 w_{31} + n_2 w_{32}}{n_1 w_{51} + n_2 w_{52}} \right)^2 + \left( a_{22} - \frac{n_1 w_{41} + n_2 w_{42}}{n_1 w_{51} + n_2 w_{52}} \right)^2, n_1 \right] // \text{Together}$$

Out[\*] =

$$\frac{1}{(n_1 w_{51} + n_2 w_{52})^3} \left( 2 \left( -n_1 n_2 w_{11} w_{12} w_{51} - n_2^2 w_{12}^2 w_{51} - n_1 n_2 w_{21} w_{22} w_{51} - n_2^2 w_{22}^2 w_{51} - n_1 n_2 w_{31} w_{32} w_{51} - \right. \right.$$

$$n_2^2 w_{32}^2 w_{51} - n_1 n_2 w_{41} w_{42} w_{51} - n_2^2 w_{42}^2 w_{51} + a_{11} n_1 n_2 w_{12} w_{51}^2 +$$

$$a_{12} n_1 n_2 w_{22} w_{51}^2 + a_{21} n_1 n_2 w_{32} w_{51}^2 + a_{22} n_1 n_2 w_{42} w_{51}^2 + n_1 n_2 w_{11}^2 w_{52} +$$

$$n_2^2 w_{11} w_{12} w_{52} + n_1 n_2 w_{21}^2 w_{52} + n_2^2 w_{21} w_{22} w_{52} + n_1 n_2 w_{31}^2 w_{52} + n_2^2 w_{31} w_{32} w_{52} +$$

$$n_1 n_2 w_{41}^2 w_{52} + n_2^2 w_{41} w_{42} w_{52} - a_{11} n_1 n_2 w_{11} w_{51} w_{52} + a_{11} n_2^2 w_{12} w_{51} w_{52} -$$

$$a_{12} n_1 n_2 w_{21} w_{51} w_{52} + a_{12} n_2^2 w_{22} w_{51} w_{52} - a_{21} n_1 n_2 w_{31} w_{51} w_{52} +$$

$$a_{21} n_2^2 w_{32} w_{51} w_{52} - a_{22} n_1 n_2 w_{41} w_{51} w_{52} + a_{22} n_2^2 w_{42} w_{51} w_{52} -$$

$$a_{11} n_2^2 w_{11} w_{52}^2 - a_{12} n_2^2 w_{21} w_{52}^2 - a_{21} n_2^2 w_{31} w_{52}^2 - a_{22} n_2^2 w_{41} w_{52}^2 \Big)$$

By solving for  $n_1$ , we get formula (10):

$$\text{In[*]} := \text{Solve} \left[ -n_1 n_2 w_{11} w_{12} w_{51} - n_2^2 w_{12}^2 w_{51} - n_1 n_2 w_{21} w_{22} w_{51} - n_2^2 w_{22}^2 w_{51} - \right.$$

$$n_1 n_2 w_{31} w_{32} w_{51} - n_2^2 w_{32}^2 w_{51} - n_1 n_2 w_{41} w_{42} w_{51} - n_2^2 w_{42}^2 w_{51} + a_{11} n_1 n_2 w_{12} w_{51}^2 +$$

$$a_{12} n_1 n_2 w_{22} w_{51}^2 + a_{21} n_1 n_2 w_{32} w_{51}^2 + a_{22} n_1 n_2 w_{42} w_{51}^2 + n_1 n_2 w_{11}^2 w_{52} +$$

$$n_2^2 w_{11} w_{12} w_{52} + n_1 n_2 w_{21}^2 w_{52} + n_2^2 w_{21} w_{22} w_{52} + n_1 n_2 w_{31}^2 w_{52} + n_2^2 w_{31} w_{32} w_{52} +$$

$$n_1 n_2 w_{41}^2 w_{52} + n_2^2 w_{41} w_{42} w_{52} - a_{11} n_1 n_2 w_{11} w_{51} w_{52} + a_{11} n_2^2 w_{12} w_{51} w_{52} -$$

$$a_{12} n_1 n_2 w_{21} w_{51} w_{52} + a_{12} n_2^2 w_{22} w_{51} w_{52} - a_{21} n_1 n_2 w_{31} w_{51} w_{52} +$$

$$a_{21} n_2^2 w_{32} w_{51} w_{52} - a_{22} n_1 n_2 w_{41} w_{51} w_{52} + a_{22} n_2^2 w_{42} w_{51} w_{52} -$$

$$a_{11} n_2^2 w_{11} w_{52}^2 - a_{12} n_2^2 w_{21} w_{52}^2 - a_{21} n_2^2 w_{31} w_{52}^2 - a_{22} n_2^2 w_{41} w_{52}^2 == 0, n_1 \Big]$$

Out[\*] =

$$\left\{ \left\{ n_1 \rightarrow \right. \right.$$

$$\left( n_2 w_{12}^2 w_{51} + n_2 w_{22}^2 w_{51} + n_2 w_{32}^2 w_{51} + n_2 w_{42}^2 w_{51} - n_2 w_{11} w_{12} w_{52} - n_2 w_{21} w_{22} w_{52} - \right.$$

$$n_2 w_{31} w_{32} w_{52} - n_2 w_{41} w_{42} w_{52} - a_{11} n_2 w_{12} w_{51} w_{52} - a_{12} n_2 w_{22} w_{51} w_{52} -$$

$$a_{21} n_2 w_{32} w_{51} w_{52} - a_{22} n_2 w_{42} w_{51} w_{52} + a_{11} n_2 w_{11} w_{52}^2 +$$

$$a_{12} n_2 w_{21} w_{52}^2 + a_{21} n_2 w_{31} w_{52}^2 + a_{22} n_2 w_{41} w_{52}^2 \Big) /$$

$$\left( -w_{11} w_{12} w_{51} - w_{21} w_{22} w_{51} - w_{31} w_{32} w_{51} - w_{41} w_{42} w_{51} + a_{11} w_{12} w_{51}^2 + \right.$$

$$a_{12} w_{22} w_{51}^2 + a_{21} w_{32} w_{51}^2 + a_{22} w_{42} w_{51}^2 + w_{11}^2 w_{52} + w_{21}^2 w_{52} + w_{31}^2 w_{52} +$$

$$w_{41}^2 w_{52} - a_{11} w_{11} w_{51} w_{52} - a_{12} w_{21} w_{51} w_{52} - a_{21} w_{31} w_{51} w_{52} - a_{22} w_{41} w_{51} w_{52} \Big) \Big\} \Big\}$$

By taking the partial derivative w.r.t. the second variable (that is,  $\partial_2 h(n_x, n_y)$ ) and replacing  $n_1$  with the above expression, we get an expression which is identically equal to 0:

$$\begin{aligned}
 \text{In}[*]:= & \left( D \left[ \left( a_{11} - \frac{n_1 w_{11} + n_2 w_{12}}{n_1 w_{51} + n_2 w_{52}} \right)^2 + \left( a_{12} - \frac{n_1 w_{21} + n_2 w_{22}}{n_1 w_{51} + n_2 w_{52}} \right)^2 + \right. \right. \\
 & \left. \left( a_{21} - \frac{n_1 w_{31} + n_2 w_{32}}{n_1 w_{51} + n_2 w_{52}} \right)^2 + \left( a_{22} - \frac{n_1 w_{41} + n_2 w_{42}}{n_1 w_{51} + n_2 w_{52}} \right)^2, n_2 \right] // \text{Together} \right) /. \\
 n_1 \rightarrow & \left( n_2 w_{12}^2 w_{51} + n_2 w_{22}^2 w_{51} + n_2 w_{32}^2 w_{51} + n_2 w_{42}^2 w_{51} - n_2 w_{11} w_{12} w_{52} - \right. \\
 & n_2 w_{21} w_{22} w_{52} - n_2 w_{31} w_{32} w_{52} - n_2 w_{41} w_{42} w_{52} - a_{11} n_2 w_{12} w_{51} w_{52} - \\
 & a_{12} n_2 w_{22} w_{51} w_{52} - a_{21} n_2 w_{32} w_{51} w_{52} - a_{22} n_2 w_{42} w_{51} w_{52} + \\
 & a_{11} n_2 w_{11} w_{52}^2 + a_{12} n_2 w_{21} w_{52}^2 + a_{21} n_2 w_{31} w_{52}^2 + a_{22} n_2 w_{41} w_{52}^2 \Big) / \\
 & \left( -w_{11} w_{12} w_{51} - w_{21} w_{22} w_{51} - w_{31} w_{32} w_{51} - w_{41} w_{42} w_{51} + a_{11} w_{12} w_{51}^2 + \right. \\
 & a_{12} w_{22} w_{51}^2 + a_{21} w_{32} w_{51}^2 + a_{22} w_{42} w_{51}^2 + w_{11}^2 w_{52} + w_{21}^2 w_{52} + w_{31}^2 w_{52} + w_{41}^2 w_{52} - \\
 & a_{11} w_{11} w_{51} w_{52} - a_{12} w_{21} w_{51} w_{52} - a_{21} w_{31} w_{51} w_{52} - a_{22} w_{41} w_{51} w_{52} \Big) // \text{Simplify} \\
 \text{Out}[*]= & 0
 \end{aligned}$$

This means that the second equation is automatically satisfied, hence system (9) has a one-parameter family of candidate optima.

By substituting the expression for  $n_1$  into the objective function, we get (14):

```

In[*]:= (a11 - (n1 w11 + n2 w12) / (n1 w51 + n2 w52))^2 + (a12 - (n1 w21 + n2 w22) / (n1 w51 + n2 w52))^2 +
  (a21 - (n1 w31 + n2 w32) / (n1 w51 + n2 w52))^2 + (a22 - (n1 w41 + n2 w42) / (n1 w51 + n2 w52))^2 /.
n1 -> (n2 w12^2 w51 + n2 w22^2 w51 + n2 w32^2 w51 + n2 w42^2 w51 - n2 w11 w12 w52 -
  n2 w21 w22 w52 - n2 w31 w32 w52 - n2 w41 w42 w52 - a11 n2 w12 w51 w52 -
  a12 n2 w22 w51 w52 - a21 n2 w32 w51 w52 - a22 n2 w42 w51 w52 +
  a11 n2 w11 w52^2 + a12 n2 w21 w52^2 + a21 n2 w31 w52^2 + a22 n2 w41 w52^2) /
  (-w11 w12 w51 - w21 w22 w51 - w31 w32 w51 - w41 w42 w51 + a11 w12 w51^2 +
  a12 w22 w51^2 + a21 w32 w51^2 + a22 w42 w51^2 + w11^2 w52 + w21^2 w52 + w31^2 w52 + w41^2 w52 -
  a11 w11 w51 w52 - a12 w21 w51 w52 - a21 w31 w51 w52 - a22 w41 w51 w52) // Simplify

Out[*]= (w22^2 w31^2 - 2 w21 w22 w31 w32 + w21^2 w32^2 + w22^2 w41^2 + w32^2 w41^2 - 2 w21 w22 w41 w42 -
  2 w31 w32 w41 w42 + w21^2 w42^2 + w31^2 w42^2 - 2 a21 w22^2 w31 w51 + 2 a21 w21 w22 w32 w51 +
  2 a12 w22 w31 w32 w51 - 2 a12 w21 w32^2 w51 - 2 a22 w22^2 w41 w51 - 2 a22 w32^2 w41 w51 +
  2 a22 w21 w22 w42 w51 + 2 a22 w31 w32 w42 w51 + 2 a12 w22 w41 w42 w51 +
  2 a21 w32 w41 w42 w51 - 2 a12 w21 w42^2 w51 - 2 a21 w31 w42^2 w51 + a11^2 w22^2 w51^2 +
  a21^2 w22^2 w51^2 + a22^2 w22^2 w51^2 - 2 a12 a21 w22 w32 w51^2 + a11^2 w32^2 w51^2 +
  a12^2 w32^2 w51^2 + a22^2 w32^2 w51^2 - 2 a12 a22 w22 w42 w51^2 - 2 a21 a22 w32 w42 w51^2 +
  a11^2 w42^2 w51^2 + a12^2 w42^2 w51^2 + a21^2 w42^2 w51^2 + w12^2 (w21^2 + w31^2 + w41^2 -
  2 a12 w21 w51 - 2 a21 w31 w51 - 2 a22 w41 w51 + a12^2 w51^2 + a21^2 w51^2 + a22^2 w51^2) +
  2 a21 w21 w22 w31 w52 - 2 a12 w22 w31^2 w52 - 2 a21 w21^2 w32 w52 +
  2 a12 w21 w31 w32 w52 + 2 a22 w21 w22 w41 w52 + 2 a22 w31 w32 w41 w52 -
  2 a12 w22 w41^2 w52 - 2 a21 w32 w41^2 w52 - 2 a22 w21^2 w42 w52 - 2 a22 w31^2 w42 w52 +
  2 a12 w21 w41 w42 w52 + 2 a21 w31 w41 w42 w52 - 2 a11^2 w21 w22 w51 w52 -
  2 a21^2 w21 w22 w51 w52 - 2 a22^2 w21 w22 w51 w52 + 2 a12 a21 w22 w31 w51 w52 +
  2 a12 a21 w21 w32 w51 w52 - 2 a11^2 w31 w32 w51 w52 - 2 a12^2 w31 w32 w51 w52 -
  2 a22^2 w31 w32 w51 w52 + 2 a12 a22 w22 w41 w51 w52 + 2 a21 a22 w32 w41 w51 w52 +
  2 a12 a22 w21 w42 w51 w52 + 2 a21 a22 w31 w42 w51 w52 - 2 a11^2 w41 w42 w51 w52 -
  2 a12^2 w41 w42 w51 w52 - 2 a21^2 w41 w42 w51 w52 + a11^2 w21^2 w52^2 + a21^2 w21^2 w52^2 +
  a22^2 w21^2 w52^2 - 2 a12 a21 w21 w31 w52^2 + a11^2 w31^2 w52^2 + a12^2 w31^2 w52^2 +
  a22^2 w31^2 w52^2 - 2 a12 a22 w21 w41 w52^2 - 2 a21 a22 w31 w41 w52^2 + a11^2 w41^2 w52^2 +
  a12^2 w41^2 w52^2 + a21^2 w41^2 w52^2 + w11^2 (w22^2 + w32^2 + w42^2 - 2 a12 w22 w52 -
  2 a21 w32 w52 - 2 a22 w42 w52 + a12^2 w52^2 + a21^2 w52^2 + a22^2 w52^2) - 2 a11 w11
  (w22^2 w51 + w32^2 w51 + w42^2 w51 - w41 w42 w52 - a22 w42 w51 w52 - w22 (w21 + a12 w51)
  w52 - w32 (w31 + a21 w51) w52 + a12 w21 w52^2 + a21 w31 w52^2 + a22 w41 w52^2) - 2 w12
  (w11 (w41 w42 - a12 w22 w51 - a21 w32 w51 - a22 w42 w51 - a22 w41 w52 + a12^2 w51 w52 +
  a21^2 w51 w52 + a22^2 w51 w52 + w21 (w22 - a12 w52) + w31 (w32 - a21 w52)) +
  a11 (-w41 w42 w51 + a12 w22 w51^2 + a21 w32 w51^2 + a22 w42 w51^2 +
  w21^2 w52 + w31^2 w52 + w41^2 w52 - a22 w41 w51 w52 -
  w21 w51 (w22 + a12 w52) - w31 w51 (w32 + a21 w52))) //
  (w12^2 w51^2 + w22^2 w51^2 + w32^2 w51^2 + w42^2 w51^2 - 2 w11 w12 w51 w52 -
  2 w21 w22 w51 w52 - 2 w31 w32 w51 w52 - 2 w41 w42 w51 w52 +
  w11^2 w52^2 + w21^2 w52^2 + w31^2 w52^2 + w41^2 w52^2)

```
